1 **An amino-terminal threonine/serine motif is necessary for activity of**  
2 **the Crp/Fnr homolog, MrpC, and for *Myxococcus xanthus***  
3 **developmental robustness**

4  
5

6 Brooke E. Feeley<sup>1</sup>, Vidhi Bhardwaj<sup>2†</sup>, Maeve McLaughlin<sup>1</sup>, Stephen Diggs<sup>3</sup>, Gregor M.  
7 Blaha<sup>3</sup>, and Penelope I. Higgs<sup>1\*</sup>

8

9 <sup>1</sup> Department of Biological Sciences, Wayne State University, Detroit, MI, USA

10

11 <sup>2</sup> Department of Ecophysiology, Max Planck Institute for Terrestrial Microbiology,  
12 Marburg, Hesse, Germany

13

14 <sup>3</sup> Department of Biochemistry, University of California, Riverside, Riverside, CA, USA

15

16

17 *Running title: MrpC TTSS amino terminal motif*

18

19 Key words: *Myxococcus xanthus*, MrpC, Crp/Fnr, development, biofilm, developmental

20 buffer

21

22

23 \* Corresponding author

24 E-Mail: [pihiggs@wayne.edu](mailto:pihiggs@wayne.edu) (PIH)

25 Ph: (313) 577-9241

26 †present address: Innoplexus AG, Frankfurt, Germany, D-65760

27

28

## 29 **Summary**

30 The Crp/Fnr family of transcriptional regulators play central roles in transcriptional  
31 control of diverse physiological responses. Activation of individual family members is  
32 controlled by a surprising diversity of mechanisms tuned to the particular physiological  
33 responses or lifestyles that they regulate. MrpC is a Crp/Fnr homolog that plays an  
34 essential role in controlling the *Myxococcus xanthus* developmental program. A long-  
35 standing model proposed that MrpC activity is controlled by the Pkn8/Pkn14  
36 serine/threonine kinase cascade which phosphorylates MrpC on threonine residue(s)  
37 located in its extreme amino terminus. In this study, we demonstrate that a stretch of  
38 consecutive threonine and serine residues, T<sub>21</sub> T<sub>22</sub> S<sub>23</sub> S<sub>24</sub>, is necessary for MrpC  
39 activity by promoting efficient DNA binding. Mass spectrometry analysis indicated the  
40 TTSS motif is not directly phosphorylated by Pkn14 *in vitro* but is necessary for efficient  
41 Pkn14-dependent phosphorylation on several residues in the remainder of the protein.  
42 Pkn8 and Pkn14 kinase activities do not play obvious roles in controlling MrpC activity in  
43 wild type *M. xanthus* under laboratory conditions, but likely modulate MrpC DNA binding  
44 in response to unknown environmental conditions. Interestingly, mutational analysis of  
45 the TTSS motif caused non-robust developmental phenotypes, revealing that MrpC  
46 plays a role in developmental buffering.

47

48

49

## 50 INTRODUCTION

51 Crp/Fnr transcriptional regulators belong to a large family characterized by an amino  
52 terminal cyclic nucleotide binding (“cNMP”) domain followed by a characteristic DNA  
53 binding domain comprised of a helix-turn-helix motif (Korner *et al.*, 2003, Soberon-  
54 Chavez *et al.*, 2017). These transcriptional regulators have been shown to control  
55 several processes central to the lifestyle of their respective bacteria, such as carbon or  
56 nitrogen source utilization, aerobic/anaerobic transition, developmental processes, and  
57 pathogenicity (Lazazzera *et al.*, 1993, Spiro & Guest, 1990, Derouaux *et al.*, 2004,  
58 Kanack *et al.*, 2006). Despite the presence of a common cNMP domain, individual  
59 groups within the family are regulated by diverse signals and transcriptional activity is  
60 controlled by different mechanisms. For example, the canonical *E. coli* Crp protein  
61 controls catabolite repression. Crp exists as an inactive dimer, which upon binding of  
62 cAMP results in allosteric reorientation of the DNA binding region allowing efficient  
63 binding to target DNA sequences (Saha *et al.*, 2015), where it activates or represses  
64 downstream genes by making specific (Benoff *et al.*, 2002). In contrast, for *E. coli* Fnr  
65 which induces genes necessary for anaerobic growth, activation is controlled by  
66 monomer to dimer transition (Lazazzera *et al.*, 1993). Fnr senses oxygen via an  
67 associated Fe-S cofactor coordinated by four cysteine residues. In the absence of  
68 oxygen (activating conditions), the Fnr dimer is stabilized by a 4Fe-4S cluster and can  
69 bind to target sequences to activate or repress gene expression (Kiley & Beinert, 1998).  
70 In the presence of oxygen, the cluster transitions ultimately to an 2Fe-2S cluster leading  
71 to destabilization of the dimer and loss of DNA binding. In yet another variation, the  
72 *Xanthomonas campestris* CLP protein, which controls several genes involved in

73 pathogenesis of plants, is a dimer which intrinsically binds target DNA sequences in the  
74 absence of ligand, but binding of di-c-GMP causes it to shift to an inactive conformation  
75 to release DNA binding sequences (Chin *et al.*, 2010).

76 MrpC is a Crp/Fnr family member necessary for the starvation-induced multicellular  
77 developmental program of *Myxococcus xanthus* (Sun & Shi, 2001). *M. xanthus* is a  
78 gram negative deltaproteobacterium commonly found in the soil (Munoz-Dorado *et al.*,  
79 2016). In vegetative (non-developing conditions), *M. xanthus* is a cooperative predator.  
80 Swarms of *M. xanthus* cells glide in search of prey microorganisms or decaying organic  
81 material. Upon encountering prey, the swarm collectively releases antibiotics and  
82 degradative enzymes to paralyze and digest the prey. Upon nutrient poor conditions,  
83 the swarm enters a developmental program culminating in the formation of multicellular  
84 fruiting bodies filled with environmentally resistant spores. During this program, cells are  
85 first directed to move into haystack-shaped mounds (aggregation centers) of  
86 approximately 100,000 cells. Exclusively within these mounds, cells are induced to  
87 differentiate into spores, forming mature fruiting bodies. Production of spores inside  
88 fruiting bodies is not the only cell fate and accounts for only ~15% of the starting  
89 population (as determined for the *M. xanthus* strain DZ2 induced to develop under  
90 submerged culture)(Lee *et al.*, 2012). The majority of the cells (~80%) undergo cell  
91 lysis, likely via programmed cell death (Rosenbluh *et al.*, 1989, Wireman & Dworkin,  
92 1977, Lee *et al.*, 2012). The remaining ~5% of cells are found as peripheral rods that  
93 remain outside of the fruiting bodies in a persister-like state (O'Connor & Zusman,  
94 1991). Spore-filled fruiting bodies are quiescent and resistant to environmental insults,

95 such as desiccation and UV, but upon return of nutrients, spores can germinate *en*  
96 *mass* to produce a productive feeding swarm (Munoz-Dorado *et al.*, 2016).  
97 MrpC plays a central role in the genetic regulatory network controlling the  
98 developmental program (Kroos, 2007), and an  $\Delta mrpC$  mutant is incapable of  
99 aggregation and fails to launch the core sporulation program (Sun & Shi, 2001,  
100 McLaughlin *et al.*, 2018). The *mrpC* gene is upregulated early after starvation and is  
101 dependent upon the MrpAB two component signal transduction system (Sun & Shi,  
102 2001). MrpB is an enhancer binding protein, which when activated by phosphorylation  
103 of its associated receiver domain, induces transcription of *mrpC* from a putative  
104 sigma<sup>54</sup>-dependent promoter (Sun & Shi, 2001). Once produced, MrpC functions as a  
105 negative autoregulator, by competing with MrpB for overlapping binding sites in the  
106 *mrpC* promoter (McLaughlin *et al.*, 2018). At least two other MrpC binding sites located  
107 upstream of the *mrpC* transcriptional start, also contribute to negative autoregulation  
108 [(McLaughlin *et al.*, 2018) and unpublished data].  
109 MrpC is a global regulator, controlling at least 200 genes during the developmental  
110 program (Robinson *et al.*, 2014). A key downstream target is the transcription factor,  
111 FruA (Ueki & Inouye, 2003, Ogawa *et al.*, 1996). FruA is an orphan response regulator  
112 that is thought to induce aggregation and then sporulation in response to C-signaling, a  
113 cell-cell contact signal which increases in intensity as cells enter into aggregation  
114 centers (Saha *et al.*, 2019, Ellehauge *et al.*, 1998, Sogaard-Andersen & Kaiser, 1996).  
115 Activated FruA and MrpC act separately and in combination to regulate a number of  
116 genes necessary for differentiation of cells inside aggregation centers into spores (Son

117 *et al.*, 2011, Lee *et al.*, 2011, Mittal & Kroos, 2009a, Mittal & Kroos, 2009b, Viswanathan  
118 *et al.*, 2007).

119 It is unclear how MrpC binding to target promoters is controlled. No native ligand for  
120 MrpC is currently known, and the protein binds efficiently to target promoters *in vitro*  
121 (Ueki & Inouye, 2003, Nariya & Inouye, 2006, Mittal & Kroos, 2009a, McLaughlin *et al.*,  
122 2018) suggesting that MrpC is intrinsically able to binding target sequences in the  
123 absence of ligand. *In vivo*, MrpC is subject to several post-translational regulatory  
124 mechanisms. The EspAC signaling system functions early during development to  
125 activate an unknown protease to target MrpC to ensure only a gradual accumulation of  
126 MrpC that is presumably necessary for production of large, well-formed aggregation  
127 centers before the onset of sporulation (Schramm *et al.*, 2012, Higgs *et al.*, 2008, Cho &  
128 Zusman, 1999). In a second, apparently unrelated system, addition of nutrients to  
129 developing cells triggers unknown protease(s) to rapidly degrade MrpC allowing  
130 reversal out of the developmental program (prior to commitment to  
131 sporulation)(Rajagopalan & Kroos, 2014). Another post-translational regulation  
132 mechanism involves the serine/threonine protein kinase (STPK) cascade comprised of  
133 Pkn8 and Pkn14. *In vitro*, Pkn8 phosphorylates Pkn14, and Pkn14 phosphorylates  
134 MrpC on threonine residue(s) in its extreme amino terminus (Nariya & Inouye, 2005b,  
135 Inouye & Nariya, 2008, Nariya & Inouye, 2006). Phosphorylation was proposed to  
136 prevent LonD protease-dependent processing to remove the amino terminal 25  
137 residues, producing 'MrpC2' (here termed MrpC<sub>ΔN25</sub>), a more active isoform. We have  
138 recently demonstrated, however, that MrpC's amino terminal extension is essential for

139 function *in vivo*, and that ‘MrpC2’ is likely an artifact of cell lysis (McLaughlin *et al.*,  
140 2018).  
141 To reconcile the previous connection between phosphorylation of the MrpC amino-  
142 terminus with the recent demonstration that the amino terminus is essential for function,  
143 we set out to revisit Pkn14-dependent phosphorylation of MrpC. We demonstrate here  
144 that a specific cluster of threonines and serines (termed the TTSS motif) in the amino-  
145 terminal region is essential for MrpC activity *in vivo*. Alanine substitution of the complete  
146 MrpC TTSS motif prevents efficient development by interfering in MrpC’s negative  
147 autoregulation, proteolytic turnover, and transcriptional activation of FruA. Interestingly,  
148 while no single residue was necessary for activity, specific combinatorial substitutions  
149 within the TTSS motif produced highly variable developmental phenotypes revealing a  
150 previously unknown role for MrpC in developmental buffering. Mass spectrometry  
151 analysis of *in vitro* Pkn14-dependent phosphorylation of MrpC revealed that the MrpC  
152 TTSS motif is not directly phosphorylated by Pkn14 but is required for efficient  
153 phosphorylation of to several residues within the cNMP and DNA binding domains.  
154 Reexamination of the role of Pkn8/14 suggests they are not active kinases during the  
155 developmental program of wild type *M. xanthus* under laboratory conditions, but likely  
156 fine tune MrpC activity in response to unknown environmental conditions. Thus, our  
157 data revises the model for Pkn8/14 control over MrpC activity and identifies an unusual  
158 TTSS motif that likely plays a role in stabilizing transitions between active and inactive  
159 MrpC states.

160

## 161 **RESULTS**

162 *A TTSS motif within the N-terminal extension is necessary for MrpC activity.*

163

164 MrpC is a Crp/Fnr family transcriptional regulator with a 29 residue N-terminal extension  
165 that is essential for *in vivo* function (McLaughlin *et al.*, 2018). No activating ligand is  
166 known for MrpC, but it was previously reported that MrpC activity is regulated by a  
167 STPK cascade which was proposed to phosphorylate MrpC on threonine residue(s)  
168 within the first 25 residues (Nariya & Inouye, 2005b, Nariya & Inouye, 2006). Sequence  
169 analysis of the amino-terminal region of MrpC shows that there are only two threonine  
170 residues (at positions 21 and 22) which are directly followed by two consecutive serine  
171 residues (Fig. 1A). As serine and threonine residues can both be phosphorylated by  
172 Ser/Thr kinases, we considered the TTSS residues a putative phosphorylation motif. To  
173 examine whether this motif was important for activity, we generated a strain in which the  
174 TTSS residues were entirely substituted with alanines in the endogenous *mrpC* locus  
175 (*mrpC<sub>AAAA</sub>*) and analyzed the resulting developmental phenotype under submerged  
176 culture conditions compared to the wild type and  $\Delta mrpC$  strains. As expected, the wild  
177 type strain produced obvious aggregates between 34 and 48 hours which darkened by  
178 72 hours of development, while the  $\Delta mrpC$  strain failed to aggregate at all (Fig. 1B). The  
179 *mrpC<sub>AAAA</sub>* strain produced abnormally shallow and elongated aggregation streams that  
180 failed to progress to aggregation centers. Analysis of heat and sonication resistant  
181 spores at 72 hours of development indicated the wild type produced  $2.6 \pm 0.5 \times 10^7$  heat  
182 and sonication resistant spores per well, while the  $\Delta mrpC$  and *mrpC<sub>AAAA</sub>* mutants  
183 produced  $\leq 0.01$  % and  $11 \pm 10$  % of wild type spore levels, respectively (Fig. 1C).  
184 Since launch of the sporulation program is coupled to completion of aggregation, we



185 could not distinguish whether defective sporulation by the *mrpC<sub>AAAA</sub>* mutant was  
186 because it failed to complete aggregation or whether MrpC<sub>AAAA</sub> specifically interfered in  
187 induction of the sporulation program. To distinguish between these two possibilities, we  
188 examined the sporulation efficiency of wild type,  $\Delta mrpC$ , and *mrpC<sub>AAAA</sub>* strains upon  
189 chemical induction of sporulation which bypasses the requirement for aggregation  
190 (Dworkin & Gibson, 1964). For this assay, vegetative broth cultures of wild type,  $\Delta mrpC$ ,  
191 or *mrpC<sub>AAAA</sub>* cells were treated with 0.5 M glycerol for 24 hours and heat and sonication  
192 resistant spores were counted. We observed that the  $\Delta mrpC$  and *mrpC<sub>AAAA</sub>* strains  
193 produced  $\leq 0.01$  and  $11 \pm 3$  % of wildtype spore levels, respectively (Fig. 1C),  
194 suggesting that MrpC<sub>AAAA</sub> was strongly reduced in triggering spore differentiation.  
195 To determine whether the *mrpC<sub>AAAA</sub>* defective developmental and sporulation  
196 phenotypes were simply explained by reduction in MrpC stability, we compared the  
197 levels of MrpC produced from the wild type, and *mrpC<sub>AAAA</sub>* strains at 0, 12, 18, 24, and  
198 36 hours of development by anti-MrpC immunoblot. As expected, wild type MrpC  
199 protein began to accumulate at 12 hours but was absent by 36 hours (Fig. 1D). The  
200 MrpC<sub>AAAA</sub> protein had ~ 2-fold increased accumulation relative to the parent strain at 12  
201 hours but was also absent by 36 hours development (Fig 1D). Thus, the development  
202 defect observed in by the *mrpC<sub>AAAA</sub>* mutant was not due to failure to accumulate  
203 MrpC<sub>AAAA</sub>, strongly suggesting that an intact TTSS motif is necessary for MrpC function.

204

205 *Consecutive intact residues within the MrpC TTSS motif are necessary for robust*  
206 *development*

207

208 To determine whether substitution of any specific residue within the TTSS motif was  
209 sufficient to observe the *mrpC*<sub>AAAA</sub> phenotype, strains bearing individual alanine  
210 substitutions of each TTSS residue were generated in the endogenous *mrpC* locus.  
211 These strains, producing MrpC<sub>T21A</sub>, MrpC<sub>T22A</sub>, MrpC<sub>S23A</sub> or MrpC<sub>S24A</sub> are hereafter  
212 designated with the TTSS substitution (i.e. *mrpC*<sub>ATSS</sub>, *mrpC*<sub>TASS</sub>, *mrpC*<sub>TTAS</sub> or *mrpC*<sub>TTSA</sub>,  
213 respectively). These mutants produced developmental phenotypes and sporulation  
214 efficiencies similar to the wild type strain (Fig. S1), suggesting no one particular  
215 individual residue in the TTSS motif was necessary for activity. Furthermore,  
216 substitution of both threonines or both serines of the TTSS motif in the endogenous  
217 *mrpC* gene (strains *mrpC*<sub>AASS</sub> or *mrpC*<sub>TTAA</sub>), respectively) also produced a wild type  
218 phenotype suggesting the neither of the threonine nor the serine residues were  
219 functionally redundant (Fig. S1).

220 We next considered whether any intact single residue within the TTSS motif was  
221 sufficient for function by constructing two different mutants in which only one residue  
222 was available for phosphorylation: *mrpC*<sub>TAAA</sub> or *mrpC*<sub>AAAS</sub>. As these mutants proved  
223 difficult to generate in the endogenous *mrpC* locus, we instead expressed the *mrpC*<sub>TTSS</sub>  
224 (wt), *mrpC*<sub>AAAA</sub>, *mrpC*<sub>TAAA</sub>, or *mrpC*<sub>AAAS</sub> clones from their endogenous promoter inserted  
225 at the Mx8 phage attachment (*attB*) site in the  $\Delta$ *mrpC* background ( $\Delta$ *mrpC attB::P*<sub>mrpC-</sub>  
226 *mrpC*<sub>TTSS</sub>, etc.; termed *att::mrpC*<sub>TTSS</sub>, etc. for short). The *att::mrpC*<sub>TTSS</sub> (wt) clone  
227 complemented  $\Delta$ *mrpC*, although aggregation onset was observed on average four  
228 hours earlier than the DZ2 parent (data not shown). The *att::mrpC*<sub>AAAA</sub> mutant  
229 phenocopied *mrpC*<sub>AAAA</sub> generated at the endogenous locus (Fig. 1 and Fig. 2). Strikingly  
230 however, independent clones and replicates of the same clones of the *att::mrpC*<sub>TAAA</sub> or

231 *att::mrpC<sub>AAAAS</sub>* strains did not display stable developmental phenotypes. To quantify the  
232 extent of phenotypic variation between replicates and between clones, we used a high-  
233 throughput, high resolution development imaging technique to generate movies of  
234 strains undergoing development (Glaser & Higgs, 2019). Stages of development were  
235 recorded for each movie and displayed as heat maps versus the indicated ranges of  
236 hours post-starvation (Fig. 2). In this assay, wild type *mrpC* clones displayed robust  
237 developmental phenotypes, with onset of aggregation observed between 24-29.5 hours  
238 post starvation, followed by initial aggregates (30-35.5 h), aggregates after  
239 consolidation/dissolution (36-41.5 h), mature immobile aggregates (42-47.5 h) and  
240 darkened fruiting bodies ( $\geq 48$  h). The *att::mrpC<sub>AAAA</sub>* clones consistently failed to  
241 develop properly (Fig. 2). However, for the *att::mrpC<sub>TAAA</sub>* or *att::mrpC<sub>AAAAS</sub>* strains,  
242 significantly different developmental patterns were observed both among clones and  
243 between replicates of the same clone (Fig. 2). Developmental patterns observed ranged  
244 from early or delayed development to failure to develop (Fig. 2). We observed the same  
245 variability in phenotypes when the *mrpC* variants were instead integrated at a different  
246 secondary site [termed 1.38kb (Garcia-Moreno *et al.*, 2010)] in the  $\Delta mrpC$  background,  
247 indicating that the variability was not due to placement at the *attB* site (Fig. S2). These  
248 results suggested that induction of development had become stochastic, perhaps  
249 because the equilibrium between active and inactive MrpC was perturbed.

250 Assuming the TTSS motif was indeed necessary for phosphorylation, we postulated that  
251 since the *mrpC<sub>AAASS</sub>* and *mrpC<sub>TTAA</sub>* mutants displayed stable wild type phenotypes (Fig.  
252 S1), perhaps any two intact TTSS residues were necessary for MrpC function. To test  
253 this hypothesis, we generated *att::mrpC<sub>TASA</sub>* clones and again observed that this mutant

254 produced variable developmental phenotypes both between clones and replicates of the  
255 same clone (Fig. 2). Together, these results suggested that at least two consecutively  
256 intact TTSS residues were necessary for MrpC function. However, from these data it  
257 was not fully clear whether the TTSS motif was directly phosphorylated or whether it  
258 served as an important polar motif necessary for stable conformational switching or  
259 protein-protein interactions.

260 Finally, as an alternate genetic approach, we attempted to generate phosphomimetic  
261 mutations in which substitution with glutamic acid may mimic a phosphorylated amino  
262 acid (Dissmeyer & Schnittger, 2011). For these analyses, we generated *att::mrpC*<sub>ETSS</sub>,  
263 *att::mrpC*<sub>EAAA</sub>, or *att::mrpC*<sub>EEEA</sub> clones to examine whether “forcing” at least one  
264 phosphorylation but leaving the remaining motif intact, or generating “constitutive single  
265 only” or “constitutive double” phosphorylation states, could reveal a phospho-code  
266 relating to function. Analysis of the developmental phenotype of these mutants  
267 indicated the ETSS substitution produced slightly variable, delayed to wild type  
268 aggregation phenotypes with fruiting bodies that sometimes failed to darken (Fig. 2),  
269 which usually indicates impaired sporulation. Both the *att::mrpC*<sub>EAAA</sub> and *att::mrpC*<sub>EEEA</sub>  
270 mutants were essentially inactive and phenocopied the *att::mrpC*<sub>A AAA</sub> phenotype (data  
271 not shown). These results suggested either that glutamic acid substitution did not act  
272 as a phosphomimetic or that the TTSS motif is not a phosphorylation target.

273

274 *Pkn14 phosphorylates MrpC in vitro on several residues in the cNMP and DNA-binding*  
275 *domains*

276

277 To determine whether we could recapitulate the observation that Pkn14 phosphorylates  
278 MrpC *in vitro* (Nariya & Inouye, 2005b), we overexpressed and purified Strep affinity  
279 tagged-Pkn14 and a kinase-dead version of the protein in which the conserved lysine at  
280 position 48 which is predicted to be necessary for ATP binding (Hanks, 2003) was  
281 substituted with asparagine (Strep-Pkn14<sub>K48N</sub>). Strep-Pkn14 or Strep-Pkn14<sub>K48N</sub> was  
282 incubated for 30 minutes in the presence of ATP, resolved by SDS-PAGE, and the  
283 resulting gel was incubated in phosphoprotein stain. Autophosphorylated Strep-Pkn14  
284 could be detected readily, while the signal on Pkn14<sub>K48N</sub> was significantly reduced (Fig.  
285 3A); the remaining signal was likely due to non-specific fluorescence because the  
286 Pkn14<sub>K48N</sub> protein was completely inactive when incubated in the presence of [ $\gamma$ -<sup>32</sup>P]  
287 ATP (data not shown). We next repeated these assays in the presence of purified hexa-  
288 histidine affinity tagged (His<sub>6</sub>) -MrpC, -MrpC lacking the 25 amino terminal residues  
289 (His<sub>6</sub>-MrpC <sub>$\Delta$ N25</sub>), His<sub>6</sub>-MrpC<sub>AAAA</sub>, or the non-specific protein Trx-His<sub>6</sub>. Phosphorylation of  
290 the MrpC protein could be detected, which was reduced 1.7- and 4.0-fold on His<sub>6</sub>-  
291 MrpC <sub>$\Delta$ N25</sub> or His<sub>6</sub>-MrpC<sub>AAAA</sub>, respectively. Some signal was observed on the non-  
292 specific protein Trx-His<sub>6</sub> (Fig. 3A). Thus, we recapitulated the result that Pkn14 appears  
293 to phosphorylate MrpC and show that phosphorylation is reduced (but not absent) if the  
294 TTSS motif is removed.

295 We next extended these analyses to examine which residues in His<sub>6</sub>-MrpC or His<sub>6</sub>-  
296 MrpC<sub>AAAA</sub> might be phosphorylated by Strep-Pkn14 *in vitro* using mass spectrometry.  
297 For this approach, Strep-Pkn14 or Strep-Pkn14<sub>K48N</sub> were incubated with His<sub>6</sub>-MrpC or  
298 His<sub>6</sub>-MrpC<sub>AAAA</sub> using the *in vitro* phosphorylation reaction conditions. Reactions were  
299 quenched, trypsin digested, and phosphopeptides were captured on titanium dioxide

300 columns, separated by liquid chromatography and subjected to mass spectrometry. In  
301 the Pkn14/MrpC reaction, we captured 72 phosphopeptides. With strict selection criteria  
302 (minimum 5 peptides detected, 0.1% false discovery rate), Ser/Thr phosphoresidues  
303 detected corresponded to MrpC S<sub>55</sub>, T<sub>56</sub> (within the cNMP-binding domain), and T<sub>173</sub>,  
304 T<sub>176</sub>, T<sub>191</sub>, and T<sub>197</sub> (within the DNA binding domain)(Fig. 3B). These phosphorylated  
305 residues were observed in two independent replicates, although the number of  
306 phosphopeptides captured varied slightly. In the Pkn14/MrpC<sub>AAAA</sub> reaction, we  
307 observed only 20 phosphopeptides, but they corresponded to the same sites as the wild  
308 type with the exception of T<sub>176</sub> and T<sub>191</sub>. As expected, no phosphopeptides could be  
309 detected in the Pkn14<sub>K48N</sub>/MrpC or Pkn14<sub>K48N</sub>/MrpC<sub>AAAA</sub> reactions, indicating that all  
310 phosphopeptides observed in the wild type Pkn14 reactions were a result of Pkn14  
311 specifically. Thus, the TTSS motif was not in fact phosphorylated by Pkn14 *in vitro*  
312 suggesting the reduction in phosphorylation on the MrpC<sub>AAAA</sub> was likely a result of  
313 inefficient recognition of MrpC as a substrate by Pkn14.

314 To rule out that the conformation of His<sub>6</sub>-MrpC<sub>AAAA</sub> was drastically perturbed, we  
315 compared the circular dichroism (CD) spectra of His<sub>6</sub>-MrpC and His<sub>6</sub>-MrpC<sub>AAAA</sub> under  
316 ionic conditions similar to those used in our *in vitro* assays (Fig. 3C). The secondary  
317 structures of His<sub>6</sub>-MrpC<sub>AAAA</sub> and His<sub>6</sub>-MrpC were identical, with characteristic  
318 absorbance peaks at  $\lambda = 208$  and 220 nm. Thus, substitution of the TTSS motif with  
319 alanines did not produce drastic changes in the secondary structure of MrpC. Together,  
320 these results suggested that the TTSS motif may instead be a MrpC recognition motif.

321

322 *The Pkn8/Pkn14 kinase cascade does not inactivate MrpC in the wild type strain under*  
323 *laboratory conditions*

324

325 Regardless of whether the TTSS motif is directly phosphorylated by Pkn14 or is merely  
326 a recognition motif that facilitates Pkn14-dependent phosphorylation of MrpC at different  
327 sites, the observation that the *mrpC<sub>AAAA</sub>* mutant does not develop suggested that  
328 phosphorylation of MrpC would serve as an activation signal, rather than the inactivation  
329 signal originally proposed based on the early developmental phenotypes previously  
330 observed for both *pkn14* and *pkn8* mutant strains in the non-wildtype *M. xanthus*  
331 background strain, DZF1 (Nariya & Inouye, 2005b). As the DZF1 (aka DK101) strain is  
332 defective in a social motility system (Wall *et al.*, 1999) which can often perturb  
333 developmental phenotypes (Lee *et al.*, 2012, Boynton *et al.*, 2013), we next sought to  
334 reexamine the developmental phenotypes of strains lacking the Pkn8/Pkn14 kinase  
335 cascade in our wild type DZ2 *M. xanthus* background. We therefore generated in-frame  
336 deletions of *pkn14* and *pkn8* and constructed point mutations predicted to render each  
337 protein kinase-dead in the endogenous locus of each gene (strains  $\Delta pkn14$ ,  $\Delta pkn8$ ,  
338 *pkn14<sub>K48N</sub>*, *pkn8<sub>K116N</sub>*, respectively). When these strains and the wild type were induced  
339 to develop under submerged culture conditions, the wild type strain produced visible  
340 aggregation centers between 28- and 35-hours post-starvation, and  $2.7 \pm 0.7 \times 10^7$  heat  
341 and sonication resistant spores at 120 hours (Fig. 4A). In contrast to previously  
342 published results, the  $\Delta pkn14$  strain showed delayed aggregation: visible aggregation  
343 centers were detected between 35 and 48 hours, approximately 6 hours later than the  
344 wild type. By 120 hours of development, the  $\Delta pkn14$  mutant sporulated at wild type

345 efficiencies ( $102 \pm 15$  % of wild type)(Fig. 4A and B). When we generated our  $\Delta pkn14$  in  
346 the DZF1 strain background and developed the strains on nutrient limited CF agar  
347 (DZF1 strains do not develop under submerged culture), we observed the same early  
348 developmental phenotype originally observed (Nariya & Inouye, 2005b), while the DZ2  
349  $\Delta pkn14$  strain again exhibited a delayed developmental phenotype (Fig. S3). Thus, we  
350 concluded that the difference in developmental phenotypes was not the result of  
351 different  $\Delta pkn14$  constructs or developmental conditions assayed, but rather due to  
352 strain background. We and others have previously observed that the DZF1 strain  
353 background yields different mutant phenotypes compared to the wild type strains DZ2  
354 and DK1622 (Lee *et al.*, 2012, Boynton *et al.*, 2013). These results in the wild type  
355 background were consistent with a model in which Pkn14-dependent phosphorylation  
356 could activate MrpC.

357 Surprisingly, however, analysis of the  $pkn14_{K48N}$  mutant indicated this strain produced a  
358 developmental phenotype indistinguishable from the wild type with respect to fruiting  
359 body production and sporulation efficiency ( $100 \pm 10$  % of wild type). It is unlikely that  
360 the K48N substitution did not inactivate Pkn14 kinase activity, because it rendered  
361 Pkn14 incapable of autophosphorylation *in vitro* (Fig. 3A and data not shown). To  
362 confirm the mutant protein accumulated properly during development, we generated  
363 antibodies against the Pkn14 protein and performed anti-Pkn14 immunoblot analysis on  
364 protein lysates harvested from wild type,  $\Delta pkn14$  and  $pkn14_{K48N}$  mutants at 0, 12, 18,  
365 24, and 36 hours of development. A band migrating at  $\sim 48$  kDa could be detected in the  
366 wild type, but not  $\Delta pkn14$  lysates, consistent with the Pkn14 predicted molecular mass  
367 of 45.4 kDa (Fig. 4C). Pkn14 was detected at highest levels in vegetative cells which



368 decreased 7.2-fold by 12 hours, remained constant at 18 and 24 hours, but was absent  
369 by 36 hours. A similar pattern could be detected for Pkn14<sub>K48N</sub> (Fig. 4C). Thus, Pkn14  
370 was expressed until at least the onset of aggregation, and disruption of auto-  
371 phosphorylation did not significantly alter its accumulation pattern. To next examine  
372 whether the *pkn14* mutants exhibited perturbed MrpC or FruA accumulation, we probed  
373 the same samples with anti-MrpC or anti-FruA immunosera. We observed similar MrpC  
374 and FruA accumulation in both the mutant *pkn14* strains compared to the wild type, with  
375 the exception that FruA levels were very slightly delayed in the  $\Delta pkn14$  mutant, likely as  
376 a result of the delayed development observed in this strain (Fig. 4C).

377 Analysis of the of the  $\Delta pkn8$  and *pkn8*<sub>K116N</sub> mutants revealed that they produced  
378 developmental phenotypes indistinguishable from the wild type with respect to fruiting  
379 body formation (Fig. 4A) and sporulation efficiency ( $97 \pm 10 \%$  and  $98 \pm 17 \%$  of wild  
380 type spores, respectively) (Fig. 4B); this phenotype was also in contrast to the early  
381 developmental phenotype observed in the DZF1 background (Nariya & Inouye, 2005b).

382 Finally, to examine whether the Pkn14 and Pkn8 kinase activity was redundant, we  
383 generated a double *pkn14*<sub>K48N</sub> *pkn8*<sub>K116N</sub> mutant. This mutant also displayed a wild type  
384 developmental phenotype (Fig. 4A). The small reduction in sporulation efficiency  
385 observed in this mutant during starvation ( $75 \pm 12 \%$ )- and glycerol ( $69 \pm 8 \%$ )-induced  
386 sporulation was not considered statistically significantly different from wild type (Fig.  
387 4B).

388 In summary, our genetic analyses suggested that under our laboratory developmental  
389 conditions, Pkn8 has no obvious role in development and that the presence of Pkn14,  
390 but not its kinase activity, is necessary to promote efficient developmental aggregation.

391 These data suggested that Pkn14-dependent phosphorylation of MrpC likely plays a  
392 role in controlling MrpC in response to perturbed conditions observed in the DZF1  
393 background, which we are currently investigating. However, as the dramatic *mrpC<sub>AAAA</sub>*  
394 developmental phenotype suggested that the TTSS motif was essential for MrpC  
395 function, and little is known about how the activity of MrpC is intrinsically controlled, we  
396 set out to examine which of the activities attributed to MrpC were perturbed by this  
397 mutant.

398

399 *Perturbation of the MrpC TTSS motif perturbs in vivo MrpC activities*

400

401 As MrpC functions as a negative autoregulator (McLaughlin *et al.*, 2018) and the  
402 *MrpC<sub>AAAA</sub>* protein accumulated slightly earlier than wild type (Fig. 1D), we first  
403 addressed whether negative autoregulation was perturbed. The effect on autoregulation  
404 was analyzed with a reporter containing mCherry (mCh) under control of the *mrpC*  
405 promoter ( $P_{mrpC}$ -mCh) (McLaughlin *et al.*, 2018) which was integrated at the Mx8 phage  
406 *att* site in the wild type, *mrpC<sub>AAAA</sub>*, and  $\Delta mrpC$  backgrounds. The developmental  
407 phenotype observed in these strains bearing the reporter was indistinguishable from the  
408 parent strains (data not shown). To examine reporter activity, each strain was harvested  
409 at 0, 12, 18, 24, 30, 36, and 48 hours of development under submerged culture, and  
410 mCherry fluorescence was recorded and normalized to total protein. As we previously  
411 reported (McLaughlin *et al.*, 2018), mCherry signal in the wild type  $P_{mrpC}$ -mCh  
412 background gradually increased over 48 hours of development, and consistent with  
413 negative autoregulation, reporter activity increased at least 3.1-fold over wild type in the

414  $\Delta mrpC$   $P_{mrpC}$ -mCh strain (Fig. 5A). In contrast, reporter activity in the  $mrpC_{AAAA}$   $P_{mrpC}$ -  
415 mCh strain was only slightly higher with a maximum fold induction of 1.9-fold over wild  
416 type at 36 hours (Fig. 5A). These results suggested that MrpC<sub>AAAA</sub> has a slight defect  
417 in autoregulation which likely explains the elevated levels of MrpC<sub>AAAA</sub> observed in the  
418 initial immunoblot analysis (Fig. 1).

419 During development, MrpC protein levels are also controlled by EspAC-dependent  
420 proteolytic turnover (Schramm *et al.*, 2012). To examine whether the MrpC $\Delta N25$  and  
421 MrpC<sub>AAAA</sub> proteins were efficiently turned over, we examined the half-life of each protein  
422 in chloramphenicol shutoff assays. For these experiments, the wild type,  $mrpC_{AAAA}$ , and  
423  $mrpC_{\Delta N25}$  strains were induced to develop under submerged culture conditions for nine  
424 hours, treated with chloramphenicol, and protein lysates harvested from cells after 0,  
425 10, 20, 30, and 60 min were subject to anti-MrpC immunoblot. Consistent with previous  
426 observations (Schramm *et al.*, 2012), we calculated an MrpC half-life of  $24 \pm 8$  min.  
427 However, MrpC<sub>AAAA</sub> and MrpC $\Delta N25$  were not efficiently turned over ( $t_{1/2} = 123 \pm 14$  and  
428  $244 \pm 122$  min, respectively)(Fig 5B). These results suggest that MrpC $\Delta N25$  and  
429 MrpC<sub>AAAA</sub> are not efficiently targeted for regulated proteolysis which likely also  
430 contributes to the elevated levels observed *in vivo* for MrpC<sub>AAAA</sub> (Fig.1D) or MrpC $\Delta N25$   
431 (McLaughlin *et al.*, 2018).

432 MrpC is also a transcriptional activator and an important target is *fruA* (Ueki & Inouye,  
433 2003). FruA is essential for induction of aggregation and sporulation (Ellehaug *et al.*,  
434 1998, Ogawa *et al.*, 1996). We next examined the accumulation of FruA in the *att::mrpC*  
435 and  $mrpC_{AAAA}$  strains by anti-FruA immunoblot analysis of lysates prepared from cells  
436 induced to develop under submerged culture conditions for 0, 12, 18, 24 and 36 hours.

437 In *att::mrpC* cells, FruA protein could be detected by 12 hours of development and  
438 continued to accumulate to at least 36 hours (Fig. 5C). No FruA could be detected in the  
439  $\Delta mrpC$  strain (Fig. 5C and data not shown). In contrast, production of FruA was  
440 severely delayed and reduced in the *mrpC<sub>AAAA</sub>* lysates (Fig. 5C). Together, these results  
441 suggested MrpC<sub>AAAA</sub> partially failed in repressing its own expression and was strongly  
442 impaired in activating *fruA* expression. The failure to efficiently induce FruA likely  
443 explained the failure to induce proper development observed in the *mrpC<sub>AAAA</sub>* mutant  
444 (Fig. 1B).

445

446 *Perturbation of the MrpC TTSS motif reduces affinity for binding sites within the mrpC*  
447 *and fruA promoters.*

448

449 To examine whether the MrpC<sub>AAAA</sub> protein was defective in binding to target promoters  
450 *in vitro*, we used electrophoretic mobility shift assays to determine the relative affinity of  
451 purified His<sub>6</sub>-MrpC or His<sub>6</sub>-MrpC<sub>AAAA</sub> for fluorescently labeled probes containing an  
452 MrpC binding site (corresponding to -237 to -266 bp upstream from the *mrpC* start; aka  
453 BS 5)(McLaughlin *et al.*, 2018). The bound and unbound fluorescent DNA probes were  
454 resolved by gel electrophoresis and probes were detected by fluorescence imager. As  
455 seen previously (McLaughlin *et al.*, 2018), 0.5-2  $\mu$ M His<sub>6</sub>-MrpC caused a progressively  
456 increasing shift in the *mrpC* binding site probe. No shift was observed when excess  
457 unlabeled probe was added indicating binding was specific (Fig 6A). In contrast, nearly  
458 2  $\mu$ M His<sub>6</sub>-MrpC<sub>AAAA</sub> was required to detect a shift in the mobility of the probe,  
459 suggesting an approximately 4-fold reduction in binding affinity (Fig. 6A).

460 To examine MrpC-binding to the *fruA* promoter, we first identified two putative MrpC  
461 binding sites situated at -366 to -395 (*fruA1*) and -341 to -370 bp (*fruA2*) from the *fruA*  
462 transcriptional start site, based on MrpC foot printing observed previously (Ueki &  
463 Inouye, 2003). When His<sub>6</sub>-MrpC was incubated with the *fruA1* probe, we observed a  
464 shift in probe migration with at least 0.5 μM His<sub>6</sub>-MrpC, whereas in the presence of His<sub>6</sub>-  
465 MrpC<sub>AAAA</sub>, an equivalent shift was observed at 2 μM (Fig. 6B). Similar results were  
466 observed if the *fruA2* probe was instead used (data not shown). These results indicated  
467 that His<sub>6</sub>-MrpC<sub>AAAA</sub> affinity for both the *mrpC* and *fruA* probes was reduced  
468 approximately 4-fold. Thus, replacing the TTSS motif in MrpC appears to reduce  
469 efficient binding of MrpC to promoters from which MrpC represses (*mrpC*) or induces  
470 (*fruA*) transcription. Interestingly, the His<sub>6</sub>-MrpC<sub>ΔN25</sub> protein, which completely lacks the  
471 N-terminus binds with equal efficiency to *mrpC* (McLaughlin *et al.*, 2018) and *fruA* (data  
472 not shown) binding sites.

473 Most Crp/Fnr family transcriptional regulators are typically dimers in solution and ligand  
474 binding induces a conformational change that increases affinity for binding to target  
475 sequences on the DNA. However, *E. coli* Fnr activity is regulated by dimer-to-monomer  
476 transition upon oxidation of an Fe-S cluster coordinated by cysteine residues. Fnr also  
477 contains an amino-terminal extension, and three out of the four cysteines that  
478 coordinate the Fe-S cluster are located near the TTSS motif in MrpC (Fig. S4). To  
479 examine whether MrpC activity was likewise controlled by monomer-to-dimer transition,  
480 and whether the TTSS motif could be involved in this transition, we subjected 8 μM  
481 purified His<sub>6</sub>-MrpC, His<sub>6</sub>-MrpC<sub>ΔN25</sub> or His<sub>6</sub>-MrpC<sub>AAAA</sub> to gel filtration analysis on a  
482 Superdex™ 200 10/300 GL column compared to molecular mass standards. For each

483 run, the absorbance at 280 nm ( $A_{280}$ ) versus retention volume was recorded and 0.8 mL  
484 fractions were collected. Fractions corresponding to  $A_{280}$  peaks were examined by SDS-  
485 PAGE for MrpC. We observed peak His<sub>6</sub>-MrpC, His<sub>6</sub>-MrpC<sub>ΔN25</sub>, or His<sub>6</sub>-MrpC<sub>AAAA</sub> in  
486 fractions corresponding to the  $A_{280}$  peaks at 15.3, 15.5, and 15.2 mL retention volumes,  
487 respectively (Fig. 6C). No MrpC was detected in the large peaks at ~10 mL retention  
488 volume which may have arisen due to light scattering. Analysis of the standard proteins  
489 indicated these retention volumes corresponded to molecular mass estimation of ~50-  
490 60 kDa, most consistent with dimer formation of MrpC; the calculated molecular masses  
491 of His<sub>6</sub>-MrpC, His<sub>6</sub>-MrpC<sub>ΔN25</sub>, and His<sub>6</sub>-MrpC<sub>AAAA</sub> proteins is 30.6, 28.2 and 30.7 kDa,  
492 respectively. Thus, neither the deletion of the N-terminal region, nor substitution of the  
493 TTSS motif prevented formation of MrpC dimers *in vitro*. These results suggested the  
494 perturbation of the TTSS motif subtly altered the conformation of MrpC resulting in  
495 reduced affinity for target promoters.

496

## 497 **DISCUSSION**

498 MrpC is a Crp/Fnr transcriptional regulator that is essential for induction of aggregation  
499 and sporulation in the *M. xanthus* developmental program. A long-standing model  
500 suggested that the Pkn8/Pkn14 serine/threonine kinase cascade repressed MrpC  
501 activity by phosphorylating MrpC on threonine residues within its amino-terminal 25  
502 residues (N25). Specifically, *in vitro* analyses showed that Pkn14 was sufficient to  
503 phosphorylate MrpC, and Pkn8 phosphorylates Pkn14, but not MrpC (Nariya & Inouye,  
504 2005b). It was assumed that the threonine at position 21 and/or 22 was the  
505 phosphorylation target, because Pkn14 did not phosphorylate MrpC2, and thin layer

506 chromatography of acid-hydrolyzed MrpC~P indicated the phosphorylated residues  
507 corresponded to phospho-threonine. Phosphorylation was proposed to prevent  
508 proteolytic processing into MrpC2 (aka MrpC<sub>ΔN25</sub>), thought to be a more active isoform  
509 (Nariya & Inouye, 2006). This model was based on the observation that: 1) deletion of  
510 either *pkn8* or *pkn14* produced an early developmental phenotype, 2) 'MrpC2' was  
511 observed at higher levels in these strains, and 3) purified MrpC<sub>ΔN25</sub> bound with higher  
512 affinity to target DNA sequences *in vitro*. However, we have recently demonstrated that  
513 the MrpC N25 is essential for activity *in vivo*, MrpC2 appears to be an artifact generated  
514 during cell lysis (McLaughlin *et al.*, 2018), and the observation that 'MrpC2' binds to  
515 target DNA sequences with higher affinity has not been reproduced (Robinson *et al.*,  
516 2014, McLaughlin *et al.*, 2018). Therefore, we set out to elucidate the functional  
517 consequences of threonine phosphorylation in the MrpC amino-terminal region by the  
518 Pkn8/Pkn14 serine/threonine kinase cascade. Focusing first on a putative TTSS  
519 phosphorylation motif in N25, we demonstrated that substitution to AAAA inactivated  
520 MrpC *in vivo* (Figs. 1A, 2, and S2). However, as Pkn14 did not phosphorylate the TTSS  
521 directly *in vitro* (Fig. 3B), we instead conclude that the TTSS motif is necessary for  
522 appropriate recognition of MrpC by Pkn14 (Fig. 3B) and efficient binding to target  
523 promoters (Fig. 6). We also reveal *M. xanthus* strain-specific activation of the Pkn8/14  
524 kinase cascade (Fig. 4). Finally, our data reveal MrpC has an important role in  
525 stabilizing *M. xanthus* development likely against micro-environmental and/or intrinsic  
526 noise (Figs. 2 and S2). We propose a revised model for control of MrpC activity that  
527 reconciles our data with previous observations; this model is presented in two parts  
528 below.

529

530 *A revised model for Pkn8/Pkn14-dependent phosphorylation of MrpC*

531

532 Our data revealed that Pkn8 and Pkn14 are not normally activated (i.e. auto-  
533 phosphorylated) under laboratory conditions in the wild type DZ2 *M. xanthus* strain,  
534 because kinase-dead versions of either (or both proteins) do not appreciably affect  
535 development (Fig. 4A and B). However, given the strong phenotype for both DZF1  
536 *pkn14*<sub>K48N</sub> (Nariya & Inouye, 2008) and DZF1  $\Delta$ *pkn14* (Nariya & Inouye, 2005b)  
537 mutations (Fig. S3), we speculate that in the DZF1 background, Pkn14 is activated  
538 (Pkn14~P) resulting in a predominantly phosphorylated MrpC (MrpC~P) species, that  
539 represses MrpC activity. Therefore, relative to the parent, the DZF1 *pkn14* mutant  
540 displays an obvious early aggregation phenotype (Nariya & Inouye, 2005b)(Fig. S3),  
541 because MrpC activity is no longer repressed by phosphorylation. The stimulus  
542 activating Pkn14 (perhaps via Pkn8) may be related to envelope stress or altered  
543 energy stores, because the DZF1 background contains the partially defective *pilQ1*  
544 allele encoding a major outer membrane secretin necessary for efficient type IV-pili  
545 production (Wall *et al.*, 1999). *M. xanthus* type IV pili are necessary for social motility  
546 and are connected to production of surface polysaccharides (Yang *et al.*, 2010, Black *et*  
547 *al.*, 2017, Hu *et al.*, 2016), suggesting multiple energy intensive processes are likely  
548 altered in this background (Hu *et al.*, 2012).

549 Another puzzling observation was that although kinase-dead Pkn14 (Pkn14<sub>K48N</sub>) did not  
550 display an obvious developmental phenotype in the DZ2 background, deletion of *pkn14*  
551 resulted in delayed development (Fig. 4A). These results suggest a specific role for



552 unphosphorylated Pkn14 in efficient induction of development. This role seems to be  
553 largely independent of MrpC, because we do not observe drastic changes in MrpC or  
554 FruA levels (targets of MrpC activity) in the  $\Delta pkn14$  mutant (Fig. 4C). Pkn14 (along with  
555 Pkn8) belongs to a large kinase / scaffold protein network (Nariya & Inouye, 2005c),  
556 which includes at least two other kinases, Pkn9 and Pkn1, which appear to induce and  
557 repress aggregation, respectively (Hanlon *et al.*, 1997, Munoz-Dorado *et al.*, 1991). We  
558 suggest unphosphorylated Pkn14 affects aggregation indirectly through these proteins,  
559 whereas when Pkn14 is stimulated to autophosphorylate, it instead represses  
560 development by direct phosphorylation of MrpC. Thus, rather than functioning as a core  
561 component in activation of MrpC, we suggest Pkn14 (and likely Pkn8) function to  
562 modulate the developmental program in response to certain environmental conditions.  
563 How could MrpC activity be repressed by phosphorylation? We did not detect *in vitro*  
564 Pkn14-dependent phosphorylation of MrpC on threonine residues in the amino terminus  
565 as previously proposed, but rather on adjacent serine threonine sites within the cNMP  
566 domain (Ser<sub>55</sub> Thr<sub>56</sub>) and on four sites within the DNA binding domain (Fig. 3B). We  
567 have not demonstrated the functionality of these residues, but the observation that  
568 MrpC becomes phosphorylated in the DNA binding region is consistent with  
569 observations that Pkn14-dependent phosphorylation of MrpC~P has been shown to  
570 reduce binding to *mrpC* and *fruA* promoters *in vitro* (Nariya & Inouye, 2006). An  
571 analogy can be drawn to the *Bradyrhizobium japonicum* (Bj) FixK<sub>2</sub> Crp/Fnr family  
572 member, which regulates genes required for microoxic, anoxic, and symbiotic growth  
573 during root nodule symbiosis with soybean plants (Nellen-Anthamatten *et al.*, 1998).  
574 BjFixK<sub>2</sub> binds target sequences in the absence of known ligand and modification of a

575 cysteine residue (Cys<sub>183</sub>) located directly adjacent to the helix-turn-helix motif in the  
576 DNA binding domain reduces DNA affinity (Mesa *et al.*, 2009). Specifically, reactive  
577 oxygen species (ROS), which likely indicate conditions are not ideal for nodulation,  
578 convert the cysteine thiol to a bulky, negatively charged, sulfinic/sulfonic acid derivative  
579 which is proposed to sterically hinder the BjFixK<sub>2</sub>-DNA interaction and repulse the  
580 phosphate backbone of the DNA (Bonnet *et al.*, 2013a). Intriguingly, one of the MrpC  
581 residues targeted by Pkn14, Thr<sub>191</sub> (Fig. 3B), corresponds by sequence alignment and  
582 MrpC secondary structure prediction to BjFixK<sub>2</sub> Cys<sub>183</sub> (Fig. S4A). Addition of a bulky  
583 negative charged phosphoryl group to Thr<sub>191</sub> can be predicted to likewise hinder MrpC  
584 interactions with the DNA backbone.

585 The function of the additional MrpC residues observed to be phosphorylated by Pkn14  
586 *in vitro* is unknown. While the observation that there are so many sites is surprising and  
587 certainly remains to be verified *in vivo*, multisite phosphorylation of transcription factors  
588 is a common phenomenon in eukaryotes contributing to integrated control of the  
589 intensity of transcription factor activation (Holmberg *et al.*, 2002). Consistently, *M.*  
590 *xanthus* encodes an unusually large number of eukaryotic-like serine/threonine protein  
591 kinases (Perez *et al.*, 2008) that are likely organized into integrated signaling networks  
592 that coordinate multiple physiological responses (Nariya & Inouye, 2005c) (Nariya &  
593 Inouye, 2002).

594

595 *The role of the MrpC amino terminal extension*

596

597 It was previously proposed that the MrpC amino-terminal extension (N25), which is not  
598 present in Crp homologs, must be removed for full MrpC activity. However, it is now  
599 clear that deletion of N25 in MrpC renders the protein inactive *in vivo* (McLaughlin *et al.*,  
600 2018). An *mrpC*<sub>ΔN25</sub> mutant is unable to: 1) aggregate or sporulate efficiently, 2) regulate  
601 *mrpC* expression by negative autoregulation (i.e. *mrpC* expression was not repressed),  
602 and 3) to induce FruA (McLaughlin *et al.*, 2018). Here, we additionally showed that  
603 MrpC<sub>ΔN25</sub> was not subject to efficient proteolytic turnover (Fig. 5B). The recent  
604 observations that purified MrpC<sub>ΔN25</sub> protein binds with equal affinity as full length MrpC  
605 to DNA target sequences *in vitro* (McLaughlin *et al.*, 2018, Robinson *et al.*, 2014),  
606 strongly suggests that the amino terminus is not required for DNA binding *per se*, but is  
607 required for additional contacts necessary to control transcription *in vivo*.  
608 Our initial hypothesis at the start of this study was that phosphorylation of one or more  
609 residues in the TTSS motif modulates these proposed interactions. First, we  
610 demonstrated that complete replacement of TTSS with alanines produced similar, but  
611 slightly less extreme, results as the *mrpC*<sub>ΔN25</sub> strain *in vivo*. The *mrpC*<sub>AAAA</sub> strain failed to  
612 aggregate and sporulate efficiently (Fig. 1B and C), displayed a reduced *mrpC* negative  
613 autoregulation (i.e. *mrpC* expression was inefficiently repressed) (Fig. 5A), induced  
614 FruA in efficiently (Fig. 5C) and was unable to effectively turnover MrpC<sub>AAAA</sub> (Fig. 5B). In  
615 contrast to MrpC<sub>ΔN25</sub>, however, purified MrpC<sub>AAAA</sub> displayed significantly reduced affinity  
616 for *mrpC* and *fruA* DNA binding sites (Fig. 6A and B). Circular dichroism analysis  
617 suggested that the MrpC<sub>AAAA</sub> mutation did not result in a drastically different secondary  
618 structure from the wild type (Fig. 3C). This observation reassured us that the reduction  
619 in DNA binding was not because the MrpC<sub>AAAA</sub> was partially unfolded and raised the

620 possibility that the TTSS to AAAA substitution may prevent the amino-terminus from  
621 assuming a configuration that stabilizes the DNA binding conformation of the protein.  
622 Finally, we did not detect Pkn14-dependent phosphorylation on the TTSS motif *in vitro*  
623 (Fig. 3B) and observed a general decrease in Pkn14-dependent phosphorylation on  
624 MrpC<sub>AAAA</sub>, suggesting inefficient recognition of MrpC<sub>AAAA</sub> by Pkn14. We favor the  
625 interpretation that the entire amino terminus serves as a general protein interaction  
626 region, consistent with its intrinsic disorder prediction (data not shown). The TTSS motif  
627 in particular may act as a polar motif that allows stabilization of protein interactions,  
628 such as cooperative interactions with itself (Nariya & Inouye, 2006), contact with RNAP  
629 (Korner *et al.*, 2003), FruA (Korner *et al.*, 2003), or proteins that modulate the  
630 developmental program through MrpC, as we propose for Pkn14.  
631 Many Crp/Fnr family members contain amino terminal extensions which are required for  
632 activity. For instance, the *E. coli* Fnr amino terminal extension contains three out of four  
633 of the cysteine residues which coordinate the Fe-S cluster that is necessary to sense  
634 anaerobic conditions (Spiro & Guest, 1990)(Fig. S4A). Intriguingly, MrpC structure  
635 predictions (Kelley *et al.*, 2015) model the TTSS motif at the end of an alpha helix that  
636 threads between the dimerization helix and the  $\beta$ -sheet scaffold and near to one of DNA  
637 binding helices in the helix-turn-helix motif (Fig. S5A). This arrangement has been seen  
638 in the crystal structure of *Mycobacterium tuberculosis* (Mt) Cmr (Ranganathan *et al.*,  
639 2018), where the amino terminal extension (helix N1) is predicted to play a role in  
640 modulating DNA binding and/or dimerization perhaps in response to cellular signals  
641 (see Fig. S4A for alignments). Thus, interaction with other proteins, or unknown ligands,  
642 may reorient the amino-terminus. The TTSS motif may play a role in modulating this

643 reorientation. Our on-going efforts to solve the MrpC structure may illuminate how the  
644 region could affect MrpC activity.

645 Interestingly, MrpC shares many architectural features with the Fnr-like branch of  
646 transcriptional regulators that regulate gene transcription in response to anaerobic or  
647 microoxic conditions. Like MrpC, BjFixK<sub>2</sub>, as well as *E. coli* (Ec) Fnr, are regulated by  
648 proteolytic turnover (Bonnet *et al.*, 2013b, Mettert & Kiley, 2005). BjFixK<sub>2</sub> contains  
649 proteolytic sequence determinants in the extreme C-terminus of the protein which are  
650 recognized and degraded by ClpAP<sub>1</sub> (Bonnet *et al.*, 2013b)(Fig. S4). In the case of  
651 EcFnr, sequence determinants are found in the both the amino terminal 5-11 residues  
652 and in the last two residues of the protein (residues 249 and 250)(Fig. S4), and  
653 proteolytic turnover is dependent on ClpXP (Mettert & Kiley, 2005). We have shown  
654 here that both MrpC<sub>AAAA</sub> and MrpC<sub>ΔN25</sub> are not subject to proteolysis (Fig. 5B)  
655 suggesting that the amino terminus may contain the sequence determinants for  
656 proteolytic turnover. However, this interpretation is complicated by the observation that  
657 EspA is highly reduced in the *mrpC*<sub>AAAA</sub> background (data not shown). EspA is an  
658 integral component of the signaling system that induces proteolytic turnover of MrpC  
659 (Mettert & Kiley, 2005), and *espA* expression is dependent on MrpC which binds to the  
660 *espA* promoter *in vitro* (A. Schramm and P. Higgs, unpublished results).

661

662 *MrpC plays a role in stabilizing the developmental program*

663

664 A surprising finding from this study is that TTSS motif mutants bearing non-consecutive  
665 T/S residues produce highly variable phenotypes ranging from wild type to early,

666 delayed, or retro development in different clones and in different biological replicates of  
667 the same clone (Figs. 2 and S2). These results reveal a previously unrecognized role  
668 for MrpC in maintaining developmental stability. It has been argued that developmental  
669 systems have evolved mechanisms to buffer against noisiness due to stochastic  
670 variation in numbers of regulatory molecules that must interact to promote progression  
671 through developmental pathways (Nijhout & Davidowitz, 2003, DeLaurier *et al.*, 2014).  
672 In the case of MrpC TTSS motif variants and *M. xanthus* development, this process  
673 most likely involves micro-environmental canalization, or buffering against phenotypic  
674 variation due to fine-scale environmental variation (such as slight differences in nutrient  
675 concentration or cell density between assays) and developmental noise (Nijhout &  
676 Davidowitz, 2003). Consistently, it has been recently observed that ultra-sensitive  
677 responses to nutrient concentration are mediated by MrpC (Hoang & Kroos, 2018).  
678 MrpC's role as an environmental capacitor is likely the result of its position as a hub in  
679 the genetic regulatory network. Multiple signaling systems feed into MrpC (Schramm *et*  
680 *al.*, 2012, Higgs *et al.*, 2008, Stein *et al.*, 2006, Nariya & Inouye, 2005a, Inouye &  
681 Nariya, 2008, Hoang & Kroos, 2018, Rajagopalan & Kroos, 2017), and MrpC directly  
682 and indirectly induces regulatory feedback loops (Kroos, 2007) (Hoang & Kroos, 2018).  
683 Furthermore, MrpC accumulation correlates with distinct cell fates: little or no MrpC is  
684 found in peripheral rods and highest accumulation in fruiting body cells (Lee *et al.*,  
685 2012) and misaccumulation of MrpC can lead to inappropriate cell fate segregation  
686 (Cho & Zusman, 1999, Schramm *et al.*, 2012). Uncoordinated and/or inefficient MrpC  
687 interactions with target promoters or binding partners, or misaccumulation in  
688 inappropriate cell types, could result in stochastic phenotypes. Consistent with the

689 observation that MrpC may be phosphorylated on multiple sites, modeling approaches  
690 have suggested that multisite phosphorylation is mechanism to filter noise (Aledo,  
691 2018). We are currently examining whether MrpC is phosphorylated *in vivo* in response  
692 to changing environmental conditions, whether the amino terminus is a general  
693 interaction motif, and whether additional STPKs play a role in this process.

694

## 695 **Experimental Procedures**

### 696 *Bacterial growth and development conditions*

697 *E. coli* cells were grown at 37 °C on LB (0.1% tryptone, 0.5% yeast extract, 0.5% NaCl)  
698 in agar plates (1.5%) or with shaking (220 rpm) in LB broth supplemented with 50 µg ml<sup>-1</sup>  
699 kanamycin, 100 µg ml<sup>-1</sup> ampicillin, and/or 34 µg ml<sup>-1</sup> chloramphenicol as needed.

700 Vegetative *M. xanthus* cells were grown at 32 °C on CYE (0.1% casitone, 0.5% yeast  
701 extract, 10 mM MOPS-KOH, pH 7.6, 8 mM MgSO<sub>4</sub>) 1.5% agar (Campos & Zusman,  
702 1975) supplemented with 100 µg ml<sup>-1</sup> kanamycin when necessary, or in CYE broth  
703 (CYE without agar) with shaking at 220 rpm.

704 *M. xanthus* strains were induced to develop under submerged culture (Lee *et al.*, 2010)  
705 unless otherwise indicated. Briefly, cells were grown overnight in CYE broth, diluted to  
706 0.035 A<sub>550</sub> in CYE and 0.5, 8, or 16 mL of cells was seeded into 24 well tissue culture  
707 plates, or 60 mm or 150 mm petri dishes, respectively. Cells were grown into a  
708 confluent layer at 32°C for 24 hours, then CYE was replaced with an equivalent volume  
709 of MMC (10 mM MOPS pH 7.6, 4 mM MgSO<sub>4</sub>, 2 mM CaCl<sub>2</sub>) to induce development.  
710 Cells were incubated undisturbed at 32°C, and pictures were recorded with a Leica  
711 DMC 2900 stereo microscope.

712 For high-throughput, high resolution development imaging (Glaser & Higgs, 2019), cells  
713 were induced to develop by submerged culture as described above, except 0.15 mL  
714 cells were seeded into each well of a 96 well microtiter plate and incubated at 32 °C.  
715 After 24 hours of development, plates were transferred to a Tecan Infinite M200 plate  
716 reader (pre-warmed to 32 °C), and images were recorded from each well every 30 min  
717 from 24-72 hours post starvation using the plate reader cell confluence feature. Images  
718 were then assembled into movies in ImageJ (Schneider *et al.*, 2012) . For each movie,  
719 the time frame of developmental stages (onset of aggregation, initial aggregates,  
720 aggregates after consolidation/dissolution, mature aggregates, and darkened fruiting  
721 bodies) were manually recorded.

722 To determine the number of spores produced during development, cells were induced  
723 to develop by submerged culture in 24 well plates as described above. After 72 or 120  
724 hours of starvation, cells from triplicate wells were harvested, pelleted at 17,000 x g for  
725 5 min, supernatant was removed, and pellets stored at -20°C or used immediately. To  
726 kill non-spores, pellets were resuspended in 0.5 mL of water, heated at 50°C for 60 min,  
727 and sonicated three times for 30 sec (0.5 sec on 0.5 sec off) at 30% output on Branson  
728 Sonifier 250a equipped with a microtip. The remaining spherical and phase bright  
729 spores were enumerated on a Hawksley Helber bacteria hemocytometer.

730 The number of chemically-induced spores were determined as described previously  
731 (Holkenbrink *et al.*, 2014). Briefly, 25 mL cultures *M. xanthus* cells were grown at 32°C  
732 in CYE broth to an OD of ~ 0.3 A<sub>550</sub>, 10 M sterile glycerol was added to a final  
733 concentration of 0.5 M and cultures were incubated at 32°C for 24 hours. The culture  
734 was pelleted and resuspended in 5 mL sterile water, and 3 x 0.5 mL were heated at



735 50°C for one hour and sonicated and counted as described above. Spore number was  
736 reported as percent of starting cells, where an OD of 0.7 A<sub>550</sub> corresponded to 4x10<sup>8</sup>  
737 cells mL<sup>-1</sup>

738

### 739 *Construction of plasmids and strains*

740 Plasmids used to construct *M. xanthus* strains (Table 1) were constructed using standard  
741 restriction enzyme/ligation cloning techniques followed by transformation into *E. coli* strain  
742 TOP10. For plasmids used to generate strains bearing in-frame deletions or point  
743 mutations in the endogenous *M. xanthus* locus, gene fragments contained ~500 bp  
744 fragments upstream and downstream from the desired deletion or point mutation and  
745 were constructed by over-lap PCR as described previously in detail (Lee *et al.*, 2010),  
746 and cloned into pBJ114 using the primers and enzymes listed in Table S2. For plasmids  
747 used to express genes at the exogenous Mx8 phage attachment site, pFM18 (kan<sup>R</sup>, Mx8  
748 *attP*) was used. Plasmid insert fragments containing the native promoter and desired  
749 mutated gene were initially constructed by overlap PCR or by direct PCR amplification  
750 using the templates, primers, and enzymes listed in Table S2. For plasmids used to  
751 express genes at the 1.38 kb *M. xanthus* genome integration site, P<sub>mrpC</sub>-*mrpC* inserts  
752 were cloned into pMR3679 (km<sup>R</sup>, 1.38 kb recombination fragment), such that the vanillate  
753 promoter was removed. Plasmid inserts were constructed as indicated in Table S2.

754 Strains bearing point mutations or in-frame deletions in the endogenous genetic locus  
755 (Tables 1 and S1) were constructed using the strategy described in detail previously  
756 (Lee *et al.*, 2010), Briefly, pBJ114 (km<sup>R</sup>, *galK*) based plasmids were introduced into the  
757 relevant *M. xanthus* strains by electroporation, and plasmid integration through

758 homologous recombination was selected by kanamycin-resistance. Plasmid loop-out  
759 via a second homologous recombination event was screened by growth on 2-5%  
760 galactose, and clones with the desired mutation were screened by PCR (in-frame  
761 deletions) or PCR amplified and then sequenced (point mutations) (Lee *et al.*, 2010).  
762 To generate strains bearing genes expressed from the Mx8 phage attachment site (*attB*),  
763 pFM18 based plasmids (Tables 1 and S1) were electroporated into the relevant *M.*  
764 *xanthus* strains and site-specific recombination into *attB* selected by kanamycin  
765 resistance and screened for correct integration by PCR as described previously  
766 (McLaughlin *et al.*, 2018). For strains bearing plasmid integrations at the 1.38kb  
767 integration site, pMR3679-based plasmids were electroporated into the relevant *M.*  
768 *xanthus* strains and homologous recombination into the 1.38 kb *M. xanthus* genome  
769 region was selected by kanamycin resistance. Resulting colonies were screened by PCR  
770 for correct integration as described previously (Garcia-Moreno *et al.*, 2009). For all  
771 constructed strains, the developmental phenotypes of at least three independent clones  
772 were assayed to confirm a true phenotype.  
773 Protein expression plasmids were constructed using the templates, oligonucleotides,  
774 and enzymes listed in Table S2.

775

#### 776 *Immunoblot analysis*

777 To generate cell lysates for immunoblot analysis, *M. xanthus* was induced to develop in  
778 150 mm petri dishes, as described above. At the indicated time points, cells were  
779 harvested, pelleted at 4696 x g at 4°C, and cell pellets were either used immediately or  
780 stored at -20°C. Cell pellets were resuspended in 0.5 mL of cold MMC, 0.5 mL of cold,

781 26% TCA was added, and tubes were incubated on ice for at least 15 minutes.  
782 Precipitated proteins were pelleted at 4°C at 17,000 x g for 5 minutes, supernatant was  
783 removed, the pellet was resuspended in 100% ice-cold acetone, centrifuged for 1  
784 minute at room temperature, and repeated. After the second acetone wash, protein  
785 pellets were resuspended in 100 µL of 100 mM Tris pH 8.0, 300 µL of clear LSB (62.5  
786 mM Tris-HCl, pH 6.8, 10% (v/v) glycerol, 2% (w/v) SDS) was added, and samples were  
787 heated at 94°C for 1 minute. Protein concentration in each sample was determined  
788 using a BCA Protein Assay Kit (Pierce). Samples were diluted to 1 µg µL<sup>-1</sup> in 2X LSB  
789 (125 mM Tris-HCl, pH 6.8, 20% (v/v) glycerol, 4% (w/v) SDS, 10% (v/v) 2-  
790 mercaptoethanol, 0.02% (w/v) bromophenol blue), heated at 99°C for 5 minutes, and  
791 then stored at -20 °C. Protein samples were resolved by sodium dodecyl sulfate  
792 polyacrylamide gel electrophoresis (SDS-PAGE) on a 13% (MrpC and FruA), or 9 %  
793 (Pkn14) polyacrylamide gel, then transferred to a polyvinylidene fluoride (PVDF)  
794 membrane (Millipore) in a semi-dry transfer apparatus (Hoefer TE77X). For Western  
795 blots, membranes were either blocked for one hour at room temperature or overnight at  
796 4°C in PBS (8 mM Na<sub>2</sub>HPO<sub>4</sub>, 2 mM KH<sub>2</sub>PO<sub>4</sub> pH 7.4, 135 mM NaCl, 3.5 mM KCl)  
797 supplemented with 0.1 % Tween and 5 % non-fat milk. Primary antibodies were used at  
798 1:500 (anti-MrpC) (Garcia-Moreno *et al.*, 2009), 1:1000 (anti-FruA) (Lobedanz &  
799 Sogaard-Andersen, 2003), or 1:500 (anti-Pkn14). Goat anti-rabbit, HRP-conjugated  
800 secondary IgG secondary antibodies were used at 1:20 000 (Pierce).  
801 Chemiluminescence (ECL Western Blotting Substrate, Pierce) and autoradiography film  
802 (Andwin Scientific) were used for detection of immune complexes. For quantitation,

803 autoradiographs were scanned, and ImageQuant TL (GE Healthcare Life Sciences) was  
804 used to quantify background-subtracted signal intensities.

805 Polyclonal rabbit anti-Pkn14 antibodies were generated by Eurogentec (Serain,  
806 Belgium) using soluble purified Strep-Pkn14 protein. Purification was performed as  
807 described below. Anti-Pkn14 antibodies were purified from serum against Step-Pkn14  
808 protein as per (Jagadeesan *et al.*, 2009).

809

### 810 *Overexpression and purification of recombinant proteins*

811 Overexpression plasmids (Table 2) for recombinant His<sub>6</sub>-tagged -MrpC, - MrpC<sub>ΔN25</sub>, -  
812 MrpC<sub>AAAA</sub>, or Trx-His<sub>6</sub>, were freshly transformed into *E. coli* BL21(λDE3) cells and ~ 3  
813 resulting colonies were grown overnight in 5 ml starter cultures, and then subcultured  
814 (1:100) into 500 ml LB broth containing the appropriate antibiotic. His-tagged proteins  
815 were induced in mid-log cells with 0.5 to 1 mM isopropyl 1-thio-β-D-galactopyranoside  
816 (IPTG) for 3 hours at 25 or 37 °C. His-tagged proteins were then purified at 4°C either  
817 by gravity flow (phosphotransfer and EMSA analyses) or FPLC (circular dichroism and  
818 gel filtration analyses) using Ni-NTA resin (Qiagen) or 5-mL HisTrap column (GE  
819 Healthcare), respectively. For purification of His<sub>6</sub>-tagged proteins by gravity flow, cell  
820 pellets were resuspended in 12 mL Lysis Buffer (50 mM HEPES-NaOH pH 7.4, 500 mM  
821 NaCl, 20 mM imidazole) containing 1 mg mL<sup>-1</sup> lysozyme and 1:100 protease inhibitor  
822 cocktail (Sigma), and lysed by French press (18,000 psi, 3 times). Unlysed cells and/or  
823 inclusion bodies were removed by centrifugation at 600 x g at 4°C for 30 min and  
824 supernatant was applied to 0.5 mL Ni-NTA resin pre-equilibrated with lysis buffer,  
825 washed with 5 column volumes (CV) Wash Buffer (50 mM HEPES pH 7.4, 500 mM

826 NaCl, 20 mM imidazole), and step-eluted with 3CV Elution Buffer (50 mM HEPES pH  
827 7.4, 500 mM NaCl) containing 100 mM, 250 mM and then 500 mM imidazole. Elution  
828 fractions containing peak amounts of purified protein were pooled, dialyzed in 900 ml  
829 Dialysis Buffer 1 (50 mM HEPES pH 7.5, 250 mM NaCl, 1 mM dithiothreitol (DTT), 10%  
830 (v/v) glycerol) for 1 hour at room temperature, then in 900 ml dialysis buffer 2 (Dialysis  
831 Buffer 1 except 100mM NaCl and 20% glycerol) overnight at 4°C. Dialyzed proteins  
832 were stored at -20°C. For FPLC purification of His-tagged proteins, induced cells were  
833 resuspended in buffer B (20 mM Tris-HCl, 500 mM NaCl, 20 mM Imidazole pH 8.5) and  
834 lysed by passing the cell suspension 3-5 times through an EmulsiFlex-C3 homogenizer  
835 at 5,000-10,000 psi. Clarified lysate was loaded onto a 5-mL HisTrap column (GE  
836 Healthcare) and weakly bound proteins were eluted off with a linear gradient from 20-  
837 300 mM imidazole (buffer B to buffer C) followed by elution of His-tagged MrpC proteins  
838 with buffer C (20 mM Tris-HCl, 100 mM NaCl, 900 mM Imidazole pH 8.9). Fractions  
839 containing MrpC were pooled, concentrated, buffer-exchanged in buffer B, and stored at  
840 4 °C until further use.

841 Overexpression plasmids (Tables 1 and S2) for recombinant Step-tagged –Pkn14, or –  
842 Pkn14<sub>K48N</sub>, were freshly transformed and induced for overexpression as described  
843 above except that the inducing agent was 0.06 µg mL<sup>-1</sup> of anhydrotetracycline for 3  
844 hours at 20°C. Cultures were then pelleted at 15,000 rpm for 15 minutes at 4°C, and  
845 cell pellets were stored at -20°C until needed. For purification of Strep-tagged proteins,  
846 cell pellets were resuspended in 30mL Buffer W (100 mM Tris pH 8.0, 150 mM NaCl, 1  
847 mM EDTA) containing 1mg mL<sup>-1</sup> lysozyme and 1:100 protease inhibitors, lysed by  
848 French press, and cleared as described above. Cell supernatants were loaded onto

849 columns containing 0.8 ml Strep-Tactin resin (IBA) pre-equilibrated with Buffer W.  
850 Columns were washed with 5 CV Buffer W and Strep-tagged proteins were eluted with  
851 4 CV Buffer E (100 mM Tris pH 8.0, 150 mM NaCl, 1 mM EDTA, 2.5 mM desthiobiotin);  
852 0.8 mL fractions were collected, analyzed by SDS-PAGE, and elution fractions  
853 containing peak amounts of purified protein were pooled, dialyzed twice as described  
854 above except dialysis buffer contained 100 mM Tris pH 8.0, 150 mM NaCl, 1 mM DTT,  
855 20% glycerol above, and stored at -20°C.

856

#### 857 *In vitro kinase reactions and analysis*

858 Kinase reactions were carried out by incubating 6 µg of each purified kinase and  
859 substrate in buffer P (50 mM Tris pH 8.0, 2.4 mM ATP, 6 mM MgCl<sub>2</sub>, 1 mM DTT) at  
860 30°C for 30 minutes (typically in 30µL total volume), and quenched with an equal  
861 volume of 2 X LSB. 18 µL of each reaction was analyzed by SDS-13% PAGE. 1µL of  
862 phosphoprotein Molecular Weight Standards (Invitrogen) was included on the gel.  
863 Protein phosphorylation was visualized by incubating the gel in ProQ Diamond®  
864 phosphoprotein stain (Invitrogen) according to the manufacturer's instructions. Briefly,  
865 gels were incubated in 100 mL ProQ Diamond® fixing solution for at least 30 minutes,  
866 washed twice with water, then stained in ProQ Diamond® phosphoprotein stain for at  
867 least 75 minutes in the dark. Gels were destained in ProQ Diamond® destain solution  
868 three times for 30 minutes, then washed in water prior to imaging on a Typhoon FLA  
869 7000 with an excitation wavelength of 532 nm and an R670 emission filter. Total protein  
870 was visualized by subsequently incubating rinsed gels in 60 mL Sypro Ruby stain  
871 (Invitrogen) overnight, followed by washes in Sypro Ruby wash solution for 30 minutes,

872 100 mL water two times for 5 minutes and then imaged at 532 nm excitation wavelength  
873 and an O580 emission filter. Signal intensities were quantified using ImageQuant TL,  
874 and background-subtracted phosphoprotein signal was normalized to background-  
875 subtracted total protein signal, then plotted as the ratio of kinase active over kinase  
876 dead reactions.

877

### 878 *Mass spectrometry*

879 For mass spectrometry analysis, Pkn14 kinase reactions with MrpC substrate were set  
880 up as described above, except that 7.5 µg of each protein was used and reactions were  
881 stopped by flash freeze in dry ice. Protein samples were then reduced with 5 mM  
882 dithiothreitol (30 min at 65°C) and alkylated with 20 mM iodoacetamide (30 min at room  
883 temperature) in 50 mM ammonium bicarbonate, and digested with 1:50 dilution of  
884 trypsin in 25 mM ammonium bicarbonate and 10% acetonitrile (overnight at 37°C).  
885 Peptides were dried and resuspended in a 2% trifluoroacetic acid and 65% acetonitrile  
886 solution that was saturated with glutamic acid. Phosphopeptide enrichment was  
887 performed using an AssayMAP Bravo automated liquid handler paired with TiO<sub>2</sub>  
888 cartridges (Agilent Technologies) according to manufacturer's instructions. Peptides  
889 were eluted with a 5% ammonium hydroxide solution, dried, and resuspended in 0.1%  
890 formic acid, 0.005% trifluoroacetic acid and 5% acetonitrile prior to LC/MS analysis.  
891 Peptides were separated by UHPLC reverse phase chromatography using C18 columns  
892 and an EASY-nLC system (Thermo) before introduction into an Orbitrap Fusion mass  
893 spectrometer (Thermo). Settings for MS1 included a scan range of 375-1600 m/z at  
894 240K resolution. For MS2 scans detected in the ion trap, peptides with +2 and +3

895 charges were fragmented by collision induced dissociation (CID) and peptides with  
896 charges +3 to +7 were fragmented by electron transfer dissociation (ETD). RAW files  
897 were searched with the Sequest algorithm within Proteome Discoverer (Thermo; ver  
898 2.1) using 100 PPM and 0.6 Da tolerances for parent and fragment ions, respectively;  
899 fixed modification of carbamidomethylation of Cys; variable modifications of  
900 deamidation of Asn/Gln, oxidation of Met, and phosphorylation of Ser/Thr/Tyr; and up to  
901 2 missed tryptic cleavages. Forward and reverse database searches were performed  
902 against a protein database for *Myxococcus xanthus* (downloaded from Uniprot on 2018-  
903 04-19; 8101 sequences). Results were imported into Scaffold (Proteome Software; ver  
904 4.8) and a subset database was searched using X! Tandem. Peptide identifications  
905 were thresholded at a 1% false discovery rate (FDR).

906

#### 907 *Circular Dichroism*

908 The CD-spectra of 56  $\mu\text{g ml}^{-1}$  His<sub>6</sub>-MrpC or His<sub>6</sub>-MrpC<sub>AAAA</sub> in 20 mM Tris-HCl pH 8 and  
909 100 mM NaCl were determined immediately after spinning the protein for 15 minutes at  
910 20,000 x g with a Jasco 815 CD spectrometer with a 1 mm pathlength in the range  $\lambda =$   
911 190-260 nm. The spectra were collected in one pass with a bandwidth of 1 nm,  
912 scanning speed of 100 nm/min, and response time of 2 seconds at room temperature,  
913 following (Greenfield, 2006).

914

#### 915 *Analysis of mCherry fluorescence*

916 Strains bearing the *mrpC* mCherry expression reporter (*attB::P<sub>mrpC</sub>-mCherry*) were  
917 analyzed for mCherry fluorescence as described previously (McLaughlin *et al.*, 2018),



918 except fluorescence was recorded in a Tecan Infinite M200 plate reader at 582 nm  
919 excitation and 613 nm emission wavelengths. Briefly, strains were induced to develop  
920 under submerged culture in 24 well plates, triplicate wells were harvested, cells were  
921 dispersed, and triplicate 150  $\mu$ L samples were analyzed for mCherry fluorescence  
922 intensity and normalized to total protein detected from remaining samples at each time  
923 point. Average data from three independent biological replicates was plotted.

924

#### 925 *Chloramphenicol shutoff assays*

926 MrpC turnover was analyzed as described previously (Schramm *et al.*, 2012). Briefly,  
927 strains were induced to develop by submerged culture in 150 mm petri dishes, as  
928 described above. Chloramphenicol was added to a final concentration of 34  $\mu$ g mL<sup>-1</sup> to  
929 one petri dish per time point for each strain, and cells were harvested at 0, 10, 20, 30, or  
930 60 minutes after addition of chloramphenicol, pelleted at 4 696 x g at 4°C, resuspended  
931 in 400  $\mu$ L of 70°C 2X LSB, then heated at 99°C for 5 minutes. Equal proportions of  
932 samples were subject to anti-MrpC immunoblot as described above. ImageQuant TL  
933 was used to quantify background-subtracted signal intensities from duplicate replicates,  
934 and the signal intensity for each time point was normalized to that of t = 0 for each  
935 strain. The natural log of those values was plotted against time, and the slope (k) of the  
936 linear fit was used to calculate the half-life ( $t_{1/2}$ ) of MrpC, using the equation  $t_{1/2} = \ln(2)/-k$

937

#### 938 *Electrophoretic mobility shift assays*

939 For electrophoretic mobility shift assays (EMSAs) were performed as described in  
940 detail, previously (McLaughlin *et al.*, 2018). Briefly, DNA probes consisted of three

941 annealed primers: a double Cy-5 labeled universal forward primer, an unlabeled forward  
942 primer that contained the protein binding site, and an unlabeled reverse primer that was  
943 complementary to both forward primers that were annealed in a thermocycler. The  
944 indicated concentrations of purified His<sub>6</sub>-MrpC or His<sub>6</sub>-MrpC<sub>AAAA</sub> were incubated with 50  
945 nM labeled probe for 30 min at 20°C and then resolved on 10% polyacrylamide (37.5:1  
946 acrylamide/bis-acrylamide gels in 0.5x TBE at 100V at 4°C. Gels were imaged with a  
947 Typhoon FLA 7000 [Pixel size: 25 μm, PMT: 500, Latitude: 4, Excitation wavelength:  
948 635 nm, Emission filter: R670].

949

#### 950 *Gel filtration analyses*

951 Analytical size-exclusion chromatography was carried out on a Superdex 200 10/300  
952 GL column (GE Healthcare) equilibrated in 20 mM Tris-HCl, 500 mM NaCl, 20 mM  
953 imidazole pH 8.5 by an ÄKTA High Performance Liquid Chromatography (HPLC)  
954 apparatus. Eight μM His<sub>6</sub>-MrpC, - MrpC<sub>ΔN25</sub> or -MrpC<sub>AAAA</sub> proteins were applied with a  
955 flow rate of 0.5 ml min<sup>-1</sup>. 0.8 mL fractions were collected, precipitated with  
956 trichloroacetic acid (TCA) and analyzed by SDS-PAGE. Molecular weight standards  
957 were used to calibrate the column: alcohol dehydrogenase (150 kDa), albumin (66 kDa),  
958 carbonic anhydrase (29 kDa), and myoglobin (17.6 kDa) had retention volumes of 13.0  
959 mL, 14.67 mL 16.75 mL, and 17.35 mL respectively.

960

#### 961 **Acknowledgements**

962 We gratefully acknowledge Xiaowei Mei for initial construction of *pkn8* and *pkn14*  
963 plasmids, Brian Nguyen for MrpC purification assistance, Petra Mann for technical

964 assistance, and Juan A. Arias Del Angel for stimulating discussions. This work was  
965 funded by the National Science Foundation Career award IOS-1651921, Wayne State  
966 startup funds, Wayne State Chemistry Biology Interface (CBI) fellowship (BF) and the  
967 Max Planck Society (PH and VB).

968

## 969 **Author Contributions**

970 PIH conceived of the study. BF, VB, MM, SD, GB and PIH acquired and/or analyzed  
971 data. PIH and BF wrote the manuscript.

972

## 973 **Supporting Information**

974

975 **Table S1.** Strains and plasmids used in supplementary data.

976 **Table S2.** Oligonucleotides and construction of plasmids used in this study.

977 **Figure S1.** Developmental phenotypes of MrpC TTSS motif mutants.

978 **Figure S2.** Insertion of  $P_{mrpC}$ -*mrpC* alleles at the 1.38kb *M. xanthus* genomic site does  
979 not rescue loss of developmental robustness.

980 **Figure S3.** Developmental phenotype of  $\Delta pkn14$  in the DZF1 versus DZ2 backgrounds.

981 **Figure S4.** Alignments of MrpC with Crp/Fnr homologs reveals functional residue  
982 conservation.

983 **Figure S5.** Predicted MrpC tertiary structure.

984

985

986 **REFERENCES**

- 987 Aledo, J.C., (2018) Multisite phosphorylation provides a reliable mechanism for making  
988 decisions in noisy environments. *The FEBS journal* **285**: 3729-3737.
- 989 Benoff, B., H. Yang, C.L. Lawson, G. Parkinson, J. Liu, E. Blatter, Y.W. Ebright, H.M.  
990 Berman & R.H. Ebright, (2002) Structural basis of transcription activation: the  
991 CAP-alpha CTD-DNA complex. *Science* **297**: 1562-1566.
- 992 Black, W.P., L. Wang, X. Jing, R.C. Saldana, F. Li, B.E. Scharf, F.D. Schubot & Z.  
993 Yang, (2017) The type IV pilus assembly ATPase PilB functions as a signaling  
994 protein to regulate exopolysaccharide production in *Myxococcus xanthus*.  
995 *Scientific reports* **7**: 7263.
- 996 Bonnet, M., M. Kurz, S. Mesa, C. Briand, H. Hennecke & M.G. Grutter, (2013a) The  
997 structure of *Bradyrhizobium japonicum* transcription factor FixK2 unveils sites of  
998 DNA binding and oxidation. *The Journal of biological chemistry* **288**: 14238-  
999 14246.
- 1000 Bonnet, M., M. Stegmann, Z. Maglica, E. Stiegeler, E. Weber-Ban, H. Hennecke & S.  
1001 Mesa, (2013b) FixK(2), a key regulator in *Bradyrhizobium japonicum*, is a  
1002 substrate for the protease ClpAP in vitro. *FEBS letters* **587**: 88-93.
- 1003 Boynton, T.O., J.L. McMurry & L.J. Shimkets, (2013) Characterization of *Myxococcus*  
1004 *xanthus* MazF and implications for a new point of regulation. *Molecular*  
1005 *microbiology* **87**: 1267-1276.
- 1006 Campos, J.M. & D.R. Zusman, (1975) Regulation of development in *Myxococcus*  
1007 *xanthus*: effect of 3':5'-cyclic AMP, ADP, and nutrition. *Proceedings of the*  
1008 *National Academy of Sciences of the United States of America* **72**: 518-522.

- 1009 Chin, K.H., Y.C. Lee, Z.L. Tu, C.H. Chen, Y.H. Tseng, J.M. Yang, R.P. Ryan, Y.  
1010 McCarthy, J.M. Dow, A.H. Wang & S.H. Chou, (2010) The cAMP receptor-like  
1011 protein CLP is a novel c-di-GMP receptor linking cell-cell signaling to virulence  
1012 gene expression in *Xanthomonas campestris*. *Journal of molecular biology* **396**:  
1013 646-662.
- 1014 Cho, K. & D.R. Zusman, (1999) Sporulation timing in *Myxococcus xanthus* is controlled  
1015 by the *espAB* locus. *Molecular microbiology* **34**: 714-725.
- 1016 DeLaurier, A., T.R. Huycke, J.T. Nichols, M.E. Swartz, A. Larsen, C. Walker, J. Dowd,  
1017 L. Pan, C.B. Moens & C.B. Kimmel, (2014) Role of *mef2ca* in developmental  
1018 buffering of the zebrafish larval hyoid dermal skeleton. *Developmental biology*  
1019 **385**: 189-199.
- 1020 Derouaux, A., S. Halici, H. Nothaft, T. Neutelings, G. Moutzourelis, J. Dusart, F.  
1021 Titgemeyer & S. Rigali, (2004) Deletion of a cyclic AMP receptor protein  
1022 homologue diminishes germination and affects morphological development of  
1023 *Streptomyces coelicolor*. *Journal of bacteriology* **186**: 1893-1897.
- 1024 Dissmeyer, N. & A. Schnittger, (2011) Use of phospho-site substitutions to analyze the  
1025 biological relevance of phosphorylation events in regulatory networks. *Methods in*  
1026 *molecular biology* **779**: 93-138.
- 1027 Dworkin, M. & S.M. Gibson, (1964) A System for Studying Microbial Morphogenesis:  
1028 Rapid Formation of Microcysts in *Myxococcus Xanthus*. *Science* **146**: 243-244.
- 1029 Ellehauge, E., M. Norregaard-Madsen & L. Sogaard-Andersen, (1998) The FruA signal  
1030 transduction protein provides a checkpoint for the temporal co-ordination of

- 1031 intercellular signals in *Myxococcus xanthus* development. *Molecular microbiology*  
1032 **30**: 807-817.
- 1033 Garcia-Moreno, D., J. Abellon-Ruiz, F. Garcia-Heras, F.J. Murillo, S. Padmanabhan &  
1034 M. Elias-Arnanz, (2010) CdnL, a member of the large CarD-like family of  
1035 bacterial proteins, is vital for *Myxococcus xanthus* and differs functionally from  
1036 the global transcriptional regulator CarD. *Nucleic acids research* **38**: 4586-4598.
- 1037 Garcia-Moreno, D., M.C. Polanco, G. Navarro-Aviles, F.J. Murillo, S. Padmanabhan &  
1038 M. Elias-Arnanz, (2009) A vitamin B12-based system for conditional expression  
1039 reveals *dksA* to be an essential gene in *Myxococcus xanthus*. *Journal of*  
1040 *bacteriology* **191**: 3108-3119.
- 1041 Glaser, M.M. & P.I. Higgs, (2019) Orphan Hybrid Histidine Protein Kinase SinK Acts as  
1042 a Signal Integrator To Fine-Tune Multicellular Behavior in *Myxococcus xanthus*.  
1043 *Journal of bacteriology* **201**.
- 1044 Greenfield, N.J., (2006) Using circular dichroism spectra to estimate protein secondary  
1045 structure. *Nat Protoc* **1**: 2876-2890.
- 1046 Hanks, S.K., (2003) Genomic analysis of the eukaryotic protein kinase superfamily: a  
1047 perspective. *Genome Biol* **4**: 111.
- 1048 Hanlon, W.A., M. Inouye & S. Inouye, (1997) Pkn9, a Ser/Thr protein kinase involved in  
1049 the development of *Myxococcus xanthus*. *Molecular microbiology* **23**: 459-471.
- 1050 Higgs, P.I., S. Jagadeesan, P. Mann & D.R. Zusman, (2008) EspA, an orphan hybrid  
1051 histidine protein kinase, regulates the timing of expression of key developmental  
1052 proteins of *Myxococcus xanthus*. *Journal of bacteriology* **190**: 4416-4426.

- 1053 Hoang, Y. & L. Kroos, (2018) Ultrasensitive Response of Developing *Myxococcus*  
1054 *xanthus* to the Addition of Nutrient Medium Correlates with the Level of MrpC.  
1055 *Journal of bacteriology* **200**.
- 1056 Holkenbrink, C., E. Hoiczky, J. Kahnt & P.I. Higgs, (2014) Synthesis and assembly of a  
1057 novel glycan layer in *Myxococcus xanthus* spores. *The Journal of biological*  
1058 *chemistry* **289**: 32364-32378.
- 1059 Holmberg, C.I., S.E. Tran, J.E. Eriksson & L. Sistonen, (2002) Multisite phosphorylation  
1060 provides sophisticated regulation of transcription factors. *Trends Biochem Sci* **27**:  
1061 619-627.
- 1062 Hu, W., M.L. Gibiansky, J. Wang, C. Wang, R. Lux, Y. Li, G.C. Wong & W. Shi, (2016)  
1063 Interplay between type IV pili activity and exopolysaccharides secretion controls  
1064 motility patterns in single cells of *Myxococcus xanthus*. *Scientific reports* **6**:  
1065 17790.
- 1066 Hu, W., J. Wang, I. McHardy, R. Lux, Z. Yang, Y. Li & W. Shi, (2012) Effects of  
1067 exopolysaccharide production on liquid vegetative growth, stress survival, and  
1068 stationary phase recovery in *Myxococcus xanthus*. *Journal of microbiology* **50**:  
1069 241-248.
- 1070 Inouye, S. & H. Nariya, (2008) Dual regulation with Ser/Thr kinase cascade and a  
1071 His/Asp TCS in *Myxococcus xanthus*. *Advances in experimental medicine and*  
1072 *biology* **631**: 111-121.
- 1073 Jagadeesan, S., P. Mann, C.W. Schink & P.I. Higgs, (2009) A novel "four-component"  
1074 two-component signal transduction mechanism regulates developmental

- 1075 progression in *Myxococcus xanthus*. *The Journal of biological chemistry* **284**:  
1076 21435-21445.
- 1077 Julien, B., A.D. Kaiser & A. Garza, (2000) Spatial control of cell differentiation in  
1078 *Myxococcus xanthus*. *Proceedings of the National Academy of Sciences of the*  
1079 *United States of America* **97**: 9098-9103.
- 1080 Kanack, K.J., L.J. Runyen-Janecky, E.P. Ferrell, S.J. Suh & S.E. West, (2006)  
1081 Characterization of DNA-binding specificity and analysis of binding sites of the  
1082 *Pseudomonas aeruginosa* global regulator, Vfr, a homologue of the *Escherichia*  
1083 *coli* cAMP receptor protein. *Microbiology* **152**: 3485-3496.
- 1084 Kelley, L.A., S. Mezulis, C.M. Yates, M.N. Wass & M.J. Sternberg, (2015) The Phyre2  
1085 web portal for protein modeling, prediction and analysis. *Nat Protoc* **10**: 845-858.
- 1086 Kiley, P.J. & H. Beinert, (1998) Oxygen sensing by the global regulator, FNR: the role of  
1087 the iron-sulfur cluster. *FEMS microbiology reviews* **22**: 341-352.
- 1088 Korner, H., H.J. Sofia & W.G. Zumft, (2003) Phylogeny of the bacterial superfamily of  
1089 Crp-Fnr transcription regulators: exploiting the metabolic spectrum by controlling  
1090 alternative gene programs. *FEMS microbiology reviews* **27**: 559-592.
- 1091 Kroos, L., (2007) The *Bacillus* and *Myxococcus* developmental networks and their  
1092 transcriptional regulators. *Annual review of genetics* **41**: 13-39.
- 1093 Lazazzera, B.A., D.M. Bates & P.J. Kiley, (1993) The activity of the *Escherichia coli*  
1094 transcription factor FNR is regulated by a change in oligomeric state. *Genes &*  
1095 *development* **7**: 1993-2005.
- 1096 Lee, B., C. Holkenbrink, A. Treuner-Lange & P.I. Higgs, (2012) *Myxococcus xanthus*  
1097 developmental cell fate production: heterogeneous accumulation of



- 1098 developmental regulatory proteins and reexamination of the role of MazF in  
1099 developmental lysis. *Journal of bacteriology* **194**: 3058-3068.
- 1100 Lee, B., A. Schramm, S. Jagadeesan & P.I. Higgs, (2010) Two-component systems and  
1101 regulation of developmental progression in *Myxococcus xanthus*. *Methods in*  
1102 *enzymology* **471**: 253-278.
- 1103 Lee, J.S., B. Son, P. Viswanathan, P.M. Luethy & L. Kroos, (2011) Combinatorial  
1104 regulation of *fmgD* by MrpC2 and FruA during *Myxococcus xanthus*  
1105 development. *Journal of bacteriology* **193**: 1681-1689.
- 1106 Letunic, I. & P. Bork, (2018) 20 years of the SMART protein domain annotation  
1107 resource. *Nucleic acids research* **46**: D493-D496.
- 1108 Lobedanz, S. & L. Sogaard-Andersen, (2003) Identification of the C-signal, a contact-  
1109 dependent morphogen coordinating multiple developmental responses in  
1110 *Myxococcus xanthus*. *Genes & development* **17**: 2151-2161.
- 1111 McLaughlin, M., V. Bhardwaj, B.E. Feeley & P.I. Higgs, (2018) MrpC, a CRP/Fnr  
1112 homolog, functions as a negative autoregulator during the *Myxococcus xanthus*  
1113 multicellular developmental program. *Molecular microbiology*.
- 1114 McNicholas, S., E. Potterton, K.S. Wilson & M.E. Noble, (2011) Presenting your  
1115 structures: the CCP4mg molecular-graphics software. *Acta Crystallogr D Biol*  
1116 *Crystallogr* **67**: 386-394.
- 1117 Mesa, S., L. Reutimann, H.M. Fischer & H. Hennecke, (2009) Posttranslational control  
1118 of transcription factor FixK2, a key regulator for the *Bradyrhizobium japonicum*-  
1119 soybean symbiosis. *Proceedings of the National Academy of Sciences of the*  
1120 *United States of America* **106**: 21860-21865.

- 1121 Mettert, E.L. & P.J. Kiley, (2005) ClpXP-dependent proteolysis of FNR upon loss of its  
1122 O<sub>2</sub>-sensing [4Fe-4S] cluster. *Journal of molecular biology* **354**: 220-232.
- 1123 Mittal, S. & L. Kroos, (2009a) A combination of unusual transcription factors binds  
1124 cooperatively to control *Myxococcus xanthus* developmental gene expression.  
1125 *Proceedings of the National Academy of Sciences of the United States of*  
1126 *America* **106**: 1965-1970.
- 1127 Mittal, S. & L. Kroos, (2009b) Combinatorial regulation by a novel arrangement of FruA  
1128 and MrpC2 transcription factors during *Myxococcus xanthus* development.  
1129 *Journal of bacteriology* **191**: 2753-2763.
- 1130 Muller, F.D., A. Treuner-Lange, J. Heider, S.M. Huntley & P.I. Higgs, (2010) Global  
1131 transcriptome analysis of spore formation in *Myxococcus xanthus* reveals a locus  
1132 necessary for cell differentiation. *BMC genomics* **11**: 264.
- 1133 Munoz-Dorado, J., S. Inouye & M. Inouye, (1991) A gene encoding a protein  
1134 serine/threonine kinase is required for normal development of *M. xanthus*, a  
1135 gram-negative bacterium. *Cell* **67**: 995-1006.
- 1136 Munoz-Dorado, J., F.J. Marcos-Torres, E. Garcia-Bravo, A. Moraleda-Munoz & J.  
1137 Perez, (2016) *Myxobacteria: Moving, Killing, Feeding, and Surviving Together*.  
1138 *Frontiers in microbiology* **7**: 781.
- 1139 Nariya, H. & M. Inouye, (2008) MazF, an mRNA interferase, mediates programmed cell  
1140 death during multicellular *Myxococcus* development. *Cell* **132**: 55-66.
- 1141 Nariya, H. & S. Inouye, (2002) Activation of 6-phosphofructokinase via phosphorylation  
1142 by Pkn4, a protein Ser/Thr kinase of *Myxococcus xanthus*. *Molecular*  
1143 *microbiology* **46**: 1353-1366.

- 1144 Nariya, H. & S. Inouye, (2005a) Factors that modulate the Pkn4 kinase cascade in  
1145 Myxococcus xanthus. *Journal of molecular microbiology and biotechnology* **9**:  
1146 147-153.
- 1147 Nariya, H. & S. Inouye, (2005b) Identification of a protein Ser/Thr kinase cascade that  
1148 regulates essential transcriptional activators in Myxococcus xanthus  
1149 development. *Molecular microbiology* **58**: 367-379.
- 1150 Nariya, H. & S. Inouye, (2005c) Modulating factors for the Pkn4 kinase cascade in  
1151 regulating 6-phosphofructokinase in Myxococcus xanthus. *Molecular*  
1152 *microbiology* **56**: 1314-1328.
- 1153 Nariya, H. & S. Inouye, (2006) A protein Ser/Thr kinase cascade negatively regulates  
1154 the DNA-binding activity of MrpC, a smaller form of which may be necessary for  
1155 the Myxococcus xanthus development. *Molecular microbiology* **60**: 1205-1217.
- 1156 Nellen-Anthamatten, D., P. Rossi, O. Preisig, I. Kullik, M. Babst, H.M. Fischer & H.  
1157 Hennecke, (1998) Bradyrhizobium japonicum FixK2, a crucial distributor in the  
1158 FixLJ-dependent regulatory cascade for control of genes inducible by low oxygen  
1159 levels. *Journal of bacteriology* **180**: 5251-5255.
- 1160 Nijhout, H.F. & G. Davidowitz, (2003) Developmental Perspectives on Phenotypic  
1161 Variation, Canalization and Fluctuating Asymmetry. In: *Developmental Instability:*  
1162 *Causes and Consequences*. M. Polak (ed). Oxford University Press, pp.
- 1163 O'Connor, K.A. & D.R. Zusman, (1991) Behavior of peripheral rods and their role in the  
1164 life cycle of Myxococcus xanthus. *Journal of bacteriology* **173**: 3342-3355.

- 1165 Ogawa, M., S. Fujitani, X. Mao, S. Inouye & T. Komano, (1996) FruA, a putative  
1166 transcription factor essential for the development of *Myxococcus xanthus*.  
1167 *Molecular microbiology* **22**: 757-767.
- 1168 Perez, J., A. Castaneda-Garcia, H. Jenke-Kodama, R. Muller & J. Munoz-Dorado,  
1169 (2008) Eukaryotic-like protein kinases in the prokaryotes and the myxobacterial  
1170 kinome. *Proceedings of the National Academy of Sciences of the United States*  
1171 *of America* **105**: 15950-15955.
- 1172 Rajagopalan, R. & L. Kroos, (2014) Nutrient-regulated proteolysis of MrpC halts  
1173 expression of genes important for commitment to sporulation during *Myxococcus*  
1174 *xanthus* development. *Journal of bacteriology* **196**: 2736-2747.
- 1175 Rajagopalan, R. & L. Kroos, (2017) The dev Operon Regulates the Timing of  
1176 Sporulation during *Myxococcus xanthus* Development. *Journal of bacteriology*  
1177 **199**.
- 1178 Ranganathan, S., J. Cheung, M. Cassidy, C. Ginter, J.D. Pata & K.A. McDonough,  
1179 (2018) Novel structural features drive DNA binding properties of Cmr, a CRP  
1180 family protein in TB complex mycobacteria. *Nucleic acids research* **46**: 403-420.
- 1181 Robinson, M., B. Son, D. Kroos & L. Kroos, (2014) Transcription factor MrpC binds to  
1182 promoter regions of hundreds of developmentally-regulated genes in  
1183 *Myxococcus xanthus*. *BMC genomics* **15**: 1123.
- 1184 Rosenbluh, A., R. Nir, E. Sahar & E. Rosenberg, (1989) Cell-density-dependent lysis  
1185 and sporulation of *Myxococcus xanthus* in agarose microbeads. *Journal of*  
1186 *bacteriology* **171**: 4923-4929.

- 1187 Saha, A., J. Mukhopadhyay, A.B. Datta & P. Parrack, (2015) Revisiting the mechanism  
1188 of activation of cyclic AMP receptor protein (CRP) by cAMP in *Escherichia coli*:  
1189 lessons from a subunit-crosslinked form of CRP. *FEBS letters* **589**: 358-363.
- 1190 Saha, S., P. Patra, O. Igoshin & L. Kroos, (2019) Systematic analysis of the  
1191 *Myxococcus xanthus* developmental gene regulatory network supports  
1192 posttranslational regulation of FruA by C-signaling. *Molecular microbiology*.
- 1193 Schneider, C.A., W.S. Rasband & K.W. Eliceiri, (2012) NIH Image to ImageJ: 25 years  
1194 of image analysis. *Nat Methods* **9**: 671-675.
- 1195 Schramm, A., B. Lee & P.I. Higgs, (2012) Intra- and interprotein phosphorylation  
1196 between two-hybrid histidine kinases controls *Myxococcus xanthus*  
1197 developmental progression. *The Journal of biological chemistry* **287**: 25060-  
1198 25072.
- 1199 Sievers, F., A. Wilm, D. Dineen, T.J. Gibson, K. Karplus, W. Li, R. Lopez, H. McWilliam,  
1200 M. Remmert, J. Soding, J.D. Thompson & D.G. Higgins, (2011) Fast, scalable  
1201 generation of high-quality protein multiple sequence alignments using Clustal  
1202 Omega. *Mol Syst Biol* **7**: 539.
- 1203 Soberon-Chavez, G., L.D. Alcaraz, E. Morales, G.Y. Ponce-Soto & L. Servin-Gonzalez,  
1204 (2017) The Transcriptional Regulators of the CRP Family Regulate Different  
1205 Essential Bacterial Functions and Can Be Inherited Vertically and Horizontally.  
1206 *Frontiers in microbiology* **8**: 959.
- 1207 Sogaard-Andersen, L. & D. Kaiser, (1996) C factor, a cell-surface-associated  
1208 intercellular signaling protein, stimulates the cytoplasmic Frz signal transduction

- 1209 system in *Myxococcus xanthus*. *Proceedings of the National Academy of*  
1210 *Sciences of the United States of America* **93**: 2675-2679.
- 1211 Son, B., Y. Liu & L. Kroos, (2011) Combinatorial regulation by MrpC2 and FruA involves  
1212 three sites in the fmgE promoter region during *Myxococcus xanthus*  
1213 development. *Journal of bacteriology* **193**: 2756-2766.
- 1214 Spiro, S. & J.R. Guest, (1990) FNR and its role in oxygen-regulated gene expression in  
1215 *Escherichia coli*. *FEMS microbiology reviews* **6**: 399-428.
- 1216 Stein, E.A., K. Cho, P.I. Higgs & D.R. Zusman, (2006) Two Ser/Thr protein kinases  
1217 essential for efficient aggregation and spore morphogenesis in *Myxococcus*  
1218 *xanthus*. *Molecular microbiology* **60**: 1414-1431.
- 1219 Sun, H. & W. Shi, (2001) Genetic studies of mrp, a locus essential for cellular  
1220 aggregation and sporulation of *Myxococcus xanthus*. *Journal of bacteriology* **183**:  
1221 4786-4795.
- 1222 Ueki, T. & S. Inouye, (2003) Identification of an activator protein required for the  
1223 induction of fruA, a gene essential for fruiting body development in *Myxococcus*  
1224 *xanthus*. *Proceedings of the National Academy of Sciences of the United States*  
1225 *of America* **100**: 8782-8787.
- 1226 Viswanathan, P., T. Ueki, S. Inouye & L. Kroos, (2007) Combinatorial regulation of  
1227 genes essential for *Myxococcus xanthus* development involves a response  
1228 regulator and a LysR-type regulator. *Proceedings of the National Academy of*  
1229 *Sciences of the United States of America* **104**: 7969-7974.

- 1230 Wall, D., P.E. Kolenbrander & D. Kaiser, (1999) The *Myxococcus xanthus* pilQ (sglA)  
1231 gene encodes a secretin homolog required for type IV pilus biogenesis, social  
1232 motility, and development. *Journal of bacteriology* **181**: 24-33.
- 1233 Wireman, J.W. & M. Dworkin, (1977) Developmentally induced autolysis during fruiting  
1234 body formation by *Myxococcus xanthus*. *Journal of bacteriology* **129**: 798-802.
- 1235 Yang, Z., R. Lux, W. Hu, C. Hu & W. Shi, (2010) PilA localization affects extracellular  
1236 polysaccharide production and fruiting body formation in *Myxococcus xanthus*.  
1237 *Molecular microbiology* **76**: 1500-1513.
- 1238  
1239

1240 **Table 1. Strains and plasmids used in this work.**

| <b><i>M. xanthus</i> strains</b> |                                                                                                                                                                                           |                                   |
|----------------------------------|-------------------------------------------------------------------------------------------------------------------------------------------------------------------------------------------|-----------------------------------|
| <b>Strain</b>                    | <b>Genotype</b>                                                                                                                                                                           | <b>Source</b>                     |
| DZ2                              | Wild type                                                                                                                                                                                 | (Campos & Zusman, 1975)           |
| PH1025                           | DZ2 $\Delta mrpC$                                                                                                                                                                         | (Lee <i>et al.</i> , 2012)        |
| PH1108                           | DZ2 $mrpC_{\Delta N25}$                                                                                                                                                                   | (McLaughlin <i>et al.</i> , 2018) |
| PH1139                           | DZ2 $mrpC_{AAAA}$                                                                                                                                                                         | This study                        |
| PH1118                           | PH1025 $attB::P_{mrpC}-mrpC$ , Km <sup>R</sup>                                                                                                                                            | (McLaughlin <i>et al.</i> , 2018) |
| PH1530                           | PH1025 $attB::P_{mrpC}-mrpC_{AAAA}$ , Km <sup>R</sup>                                                                                                                                     | This study                        |
| PH1531                           | PH1025 $attB::P_{mrpC}-mrpC_{TAAA}$ , Km <sup>R</sup>                                                                                                                                     | This study                        |
| PH1532                           | PH1025 $attB::P_{mrpC}-mrpC_{AAAS}$ , Km <sup>R</sup>                                                                                                                                     | This study                        |
| PH1547                           | PH1025 $attB::P_{mrpC}-mrpC_{TASA}$ , Km <sup>R</sup>                                                                                                                                     | This study                        |
| PH1533                           | PH1025 $attB::P_{mrpC}-mrpC_{ETSS}$ , Km <sup>R</sup>                                                                                                                                     | This study                        |
| PH1132                           | DZ2 $\Delta pkn14$                                                                                                                                                                        | This study                        |
| PH1133                           | DZ2 $pkn14_{K48N}$                                                                                                                                                                        | This study                        |
| PH1347                           | DZ2 $\Delta pkn8$                                                                                                                                                                         | This study                        |
| PH1548                           | DZ2 $pkn8_{K116N}$                                                                                                                                                                        | This study                        |
| PH1549                           | PH1133 $pkn8_{K116N}$                                                                                                                                                                     | This study                        |
| PH1100                           | DZ2 $attB::P_{mrpC}-mCherry$ , Km <sup>R</sup>                                                                                                                                            | (McLaughlin <i>et al.</i> , 2018) |
| PH1104                           | PH1025 $attB::P_{mrpC}-mCherry$ , Km <sup>R</sup>                                                                                                                                         | (McLaughlin <i>et al.</i> , 2018) |
| PH1306                           | PH1139 $attB::P_{mrpC}-mCherry$ , Km <sup>R</sup>                                                                                                                                         | This study                        |
| <b><i>E. coli</i> strains</b>    |                                                                                                                                                                                           |                                   |
| <b>Strain</b>                    | <b>Genotype</b>                                                                                                                                                                           | <b>Source</b>                     |
| TOP10                            | F <sup>-</sup> <i>endA1 recA1 galE15 galK16 nupG rpsL</i><br>$\Delta lacX74 \Phi 80 lacZ \Delta M15 araD139 \Delta(ara, leu)7697$<br><i>mcrA</i> $\Delta(mrr-hsdRMS-mcrBC)$ $\lambda^{-}$ | Invitrogen                        |
| BL21 $\lambda$ DE3               | F <sup>-</sup> <i>ompT gal dcm lon hsdS<sub>B</sub> (r<sub>B</sub><sup>-</sup> m<sub>B</sub><sup>-</sup>)</i> $\lambda$ (DE3 [ <i>lacI lacUV5-T7 gene 1 ind1 sam7 nin5</i> ])             | Novagen                           |
| <b>Plasmid</b>                   | <b>Genotype</b>                                                                                                                                                                           | <b>Source</b>                     |
| <b>Mutagenesis plasmids</b>      |                                                                                                                                                                                           |                                   |
| pBJ114                           | Suicide plasmid with Km <sup>R</sup> and galK                                                                                                                                             | (Julien <i>et al.</i> , 2000)     |
| pVG129                           | pBJ114 $mrpC_{AAAA}$                                                                                                                                                                      | This study                        |
| pFM18                            | Mx8 phage <i>attP</i> integration plasmid                                                                                                                                                 | (Muller <i>et al.</i> , 2010)     |
| pBEF010                          | pFM18 $P_{mrpC}-mrpC_{AAAA}$                                                                                                                                                              | This study                        |
| pBEF007                          | pFM18 $P_{mrpC}-mrpC_{TAAA}$                                                                                                                                                              | This study                        |
| pBEF011                          | pFM18 $P_{mrpC}-mrpC_{AAAS}$                                                                                                                                                              | This study                        |
| pBEF015                          | pFM18 $P_{mrpC}-mrpC_{TASA}$                                                                                                                                                              | This study                        |
| pBEF006                          | pFM18 $P_{mrpC}-mrpC_{ETSS}$                                                                                                                                                              | This study                        |
| pXM001                           | pBJ114 $\Delta pkn14$                                                                                                                                                                     | This study                        |



|                                |                                                                                |                                   |
|--------------------------------|--------------------------------------------------------------------------------|-----------------------------------|
| pVG125                         | pBJ114 <i>pkn14</i> <sub>K48N</sub>                                            | This study                        |
| pXM002                         | pBJ114 $\Delta$ <i>pkn8</i>                                                    | This study                        |
| pXM003                         | pBJ114 <i>pkn8</i> <sub>K116N</sub>                                            | This study                        |
| pPTM014                        | Mx8 <i>attP</i> , P <sub><i>mrpC</i></sub> - <i>mCherry</i>                    | (McLaughlin <i>et al.</i> , 2018) |
| <b>Overexpression plasmids</b> |                                                                                |                                   |
| pET28a+                        | T7 promotor, His <sub>6</sub> tag (N-terminal), <i>Km</i> <sup>R</sup>         | Novagen                           |
| pPH158                         | pET28a+ <i>mrpC</i> , <i>Km</i> <sup>R</sup>                                   | (Lee <i>et al.</i> , 2012)        |
| pPH167                         | pET28a+ <i>mrpC</i> <sub><math>\Delta</math>N25</sub> , <i>Km</i> <sup>R</sup> | (McLaughlin <i>et al.</i> , 2018) |
| pVG131                         | pET28a+ <i>mrpC</i> <sub>AAAA</sub> , <i>Km</i> <sup>R</sup>                   | This study                        |
| pASK-IBA15+                    | <i>tet</i> promoter, <i>Strep</i> tag II (N-terminal), <i>Ap</i> <sup>R</sup>  | IBA Lifesciences                  |
| pPH166                         | pASK-IBA15+ <i>pkn14</i>                                                       | This study                        |
| pVG130                         | pASK-IBA15+ <i>pkn14</i> <sub>K48N</sub>                                       | This study                        |
| pET32a+                        | T7 promotor, Trx, His <sub>6</sub> tag, <i>Ap</i> <sup>R</sup>                 | Novagen                           |

1241

1242

1243 **FIGURES**

1244

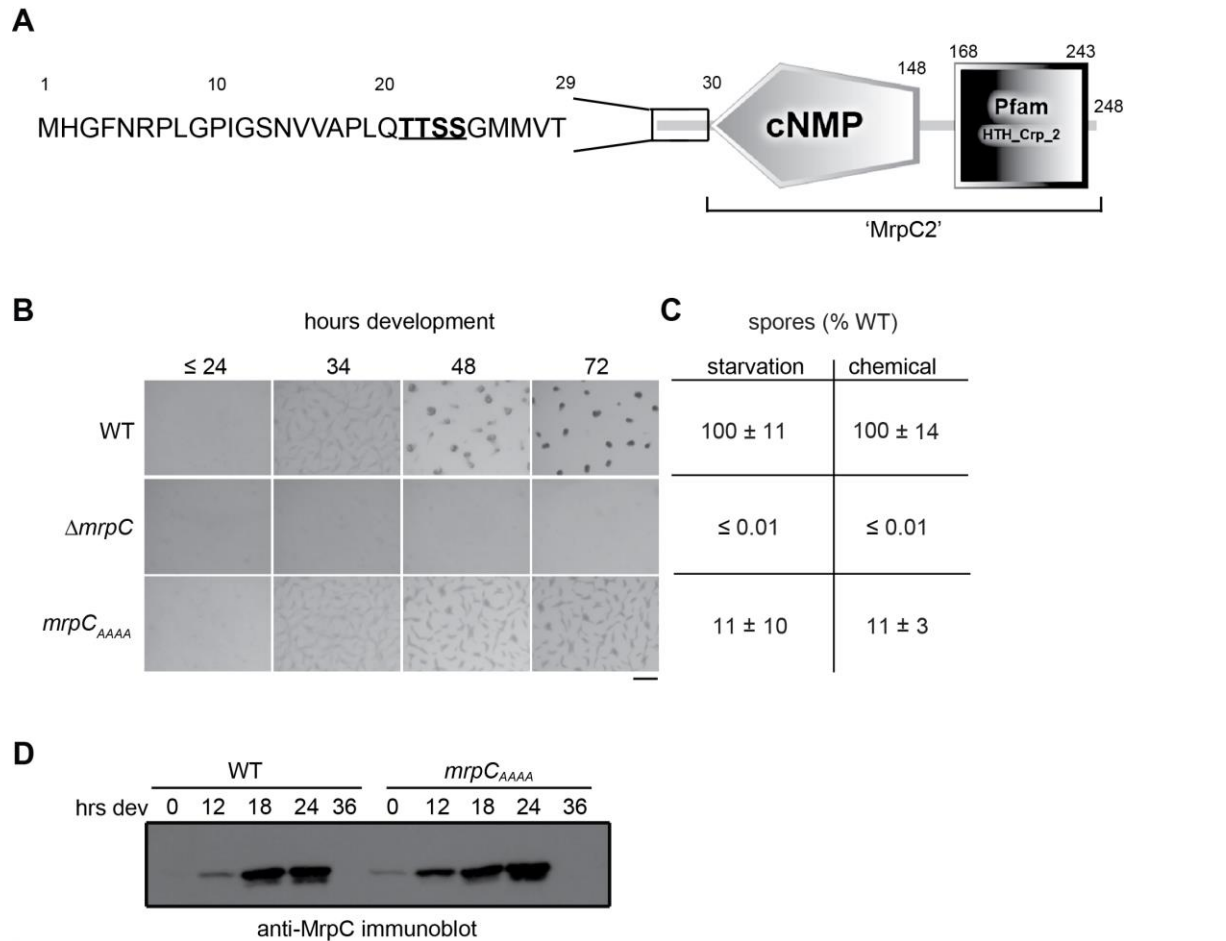

1245

1246

1247 Figure 1. A TTSS motif within the N-terminus of MrpC is necessary for function. A.

1248 Domain architecture of MrpC depicted by SMART analysis (Letunic & Bork, 2018)

1249 showing the predicted cyclic nucleotide monophosphate binding (cNMP) and DNA

1250 binding domains (Pfam HTH\_Crp\_2). The sequence of the N-terminal 29 residues is

1251 shown with the TTSS motif underlined and in bold. Residue numbers are depicted

1252 above. “MrpC2” (aka MrpC<sub>N25</sub>) is a truncated MrpC that lacks the N-terminal 25

1253 residues. B. Developmental phenotypes of wildtype (wt: DZ2),  $\Delta mrpC$  (PH1025), and

1254 *mrpC<sub>AAAA</sub>* (PH1139) strains induced to develop under submerged culture and recorded  
1255 at the indicated hours post-starvation. Bar: 0.5 mm C. Percent of wild type heat and  
1256 sonication resistant spores harvested from cells developed for 72 hours under  
1257 submerged culture (starvation) or after 24 hours of chemical induction with 0.5 M  
1258 glycerol (chemical). Values are the average and associated standard deviations from  
1259 three independent biological replicates. D. Anti-MrpC immunoblot analysis of protein  
1260 lysates harvested from wild type (WT: DZ2) or *mrpC<sub>AAAA</sub>* (PH1139) cells developing  
1261 under submerged culture for the indicated hours.  
1262

1263

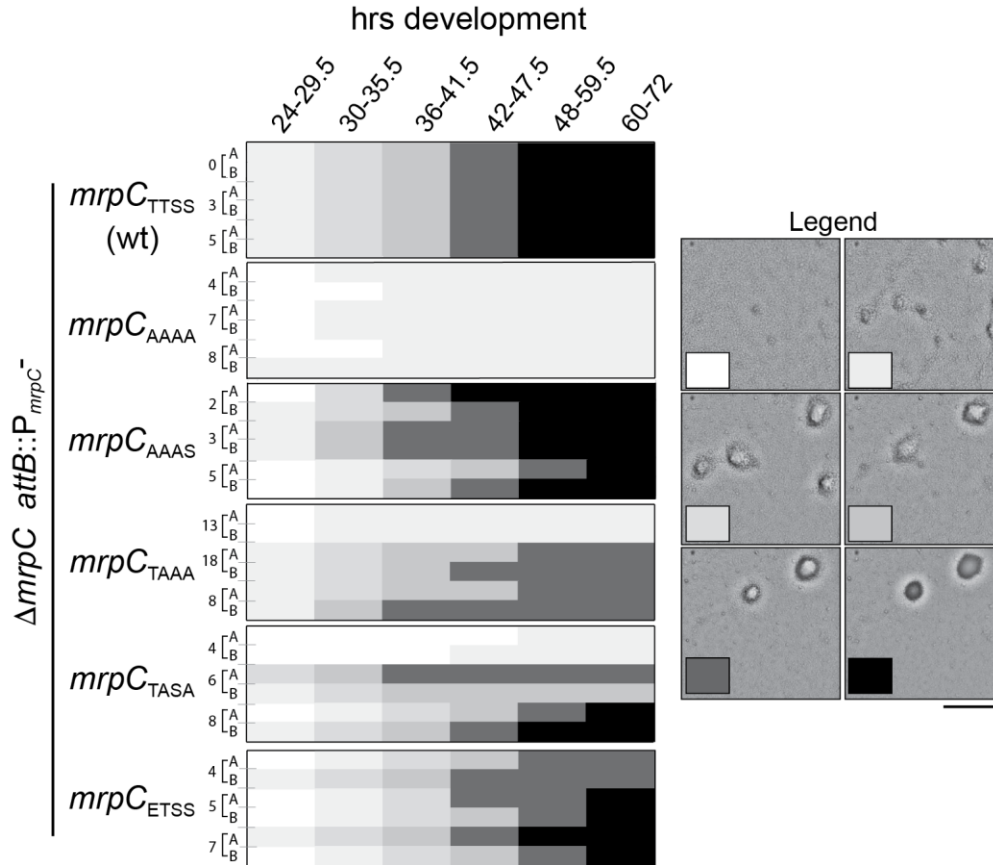

1264

1265 Figure 2. Lack of consecutive intact MrpC TTSS motif residues leads to loss of  
1266 developmental robustness. Inter- and intra-clone variability in the developmental  
1267 phenotypes of *mrpC*<sup>TTSS</sup> (wild type)(PH1118), *mrpC*<sup>AAAA</sup> (PH1530), *mrpC*<sup>AAAS</sup> (PH1532),  
1268 *mrpC*<sup>TAAA</sup> (PH1531), *mrpC*<sup>TASA</sup> (PH1547), and *mrpC*<sup>ETSS</sup> (PH1533) genes integrated at  
1269 the *attB* site in the  $\Delta mrpC$  background. The heat maps shown indicate the variability in  
1270 the timing and extent of completion of fruiting body formation during development under  
1271 submerged culture conditions in 96 well plates in the indicated ranges of developmental  
1272 times. Replicates are indicated by letters (A,B), and independent clones are  
1273 represented by clone number. The shade of box corresponds to the extent of

1274 development as indicated by representative pictures in the legend (see text for details).

1275 Bar: 250  $\mu\text{m}$ .

1276

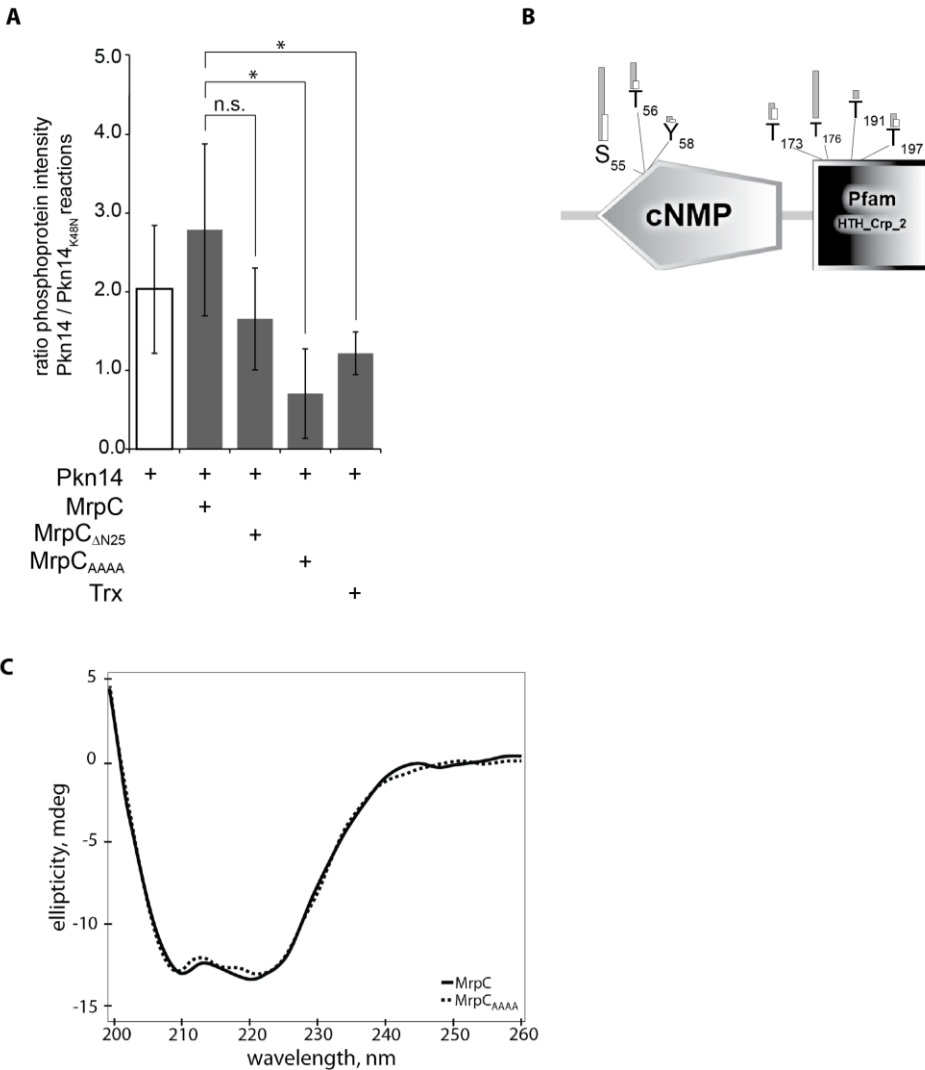

1277

1278

1279 Figure 3. Pkn14 does not phosphorylate MrpC on the TTSS motif *in vitro*. A. Specific  
1280 phosphoprotein stain intensities from Strep-Pkn14 autophosphorylation (white bar) or  
1281 from Pkn14-dependent phosphorylation of His<sub>6</sub>-MrpC, His<sub>6</sub>-MrpC<sub>ΔN25</sub>, His<sub>6</sub>-MrpC<sub>AAAA</sub>, or  
1282 the non-specific protein Trx-His<sub>6</sub>, as indicated (grey bars). For each reaction, Strep-  
1283 Pkn14 or -Pkn14<sub>K48N</sub> were incubated in kinase buffer and indicated substrate.  
1284 Reactions were resolved by protein gel electrophoresis, and phosphorylated proteins  
1285 were detected by phosphoprotein stain, and then by total protein stain. Phosphoprotein

1286 signal intensities were first normalized to total protein and then normalized to  
1287 phosphoprotein signal intensities from the kinase dead Pkn14<sub>K48N</sub> reactions. Data points  
1288 are the averages and associated standard deviations from three independent replicates.  
1289 \*,  $p$ -value  $\leq 0.05$  as determined by Student's t-test; n.s., not significant. B. Pkn14-  
1290 dependent phosphorylated residues on MrpC detected by mass spectrometry. *In vitro*  
1291 kinase reactions containing Pkn14 or Pkn14<sub>K48N</sub> and MrpC or MrpC<sub>AAAA</sub> were trypsin  
1292 digested and TiO<sub>2</sub>-enriched phosphopeptides were subject to MS/MS analysis.  
1293 Peptides are shown which meet stringent cutoff criteria (minimum 5 peptides detected,  
1294 0.1% FDR). Phosphorylation counts on MrpC (grey bars) or MrpC<sub>AAAA</sub> (white bars)  
1295 residues are shown. No phosphorylation counts were detected in the respective  
1296 Pkn14<sub>K48N</sub> reactions. The MrpC domain architecture from SMART analysis is depicted  
1297 (Letunic & Bork, 2018). C. Circular dichroism analysis of His-MrpC (blue trace) and His-  
1298 MrpC<sub>AAAA</sub> (red trace). Measurements were performed under ionic conditions similar to  
1299 those used in our *in vitro* assays.

1300

1301

1302

1303

1304

1305

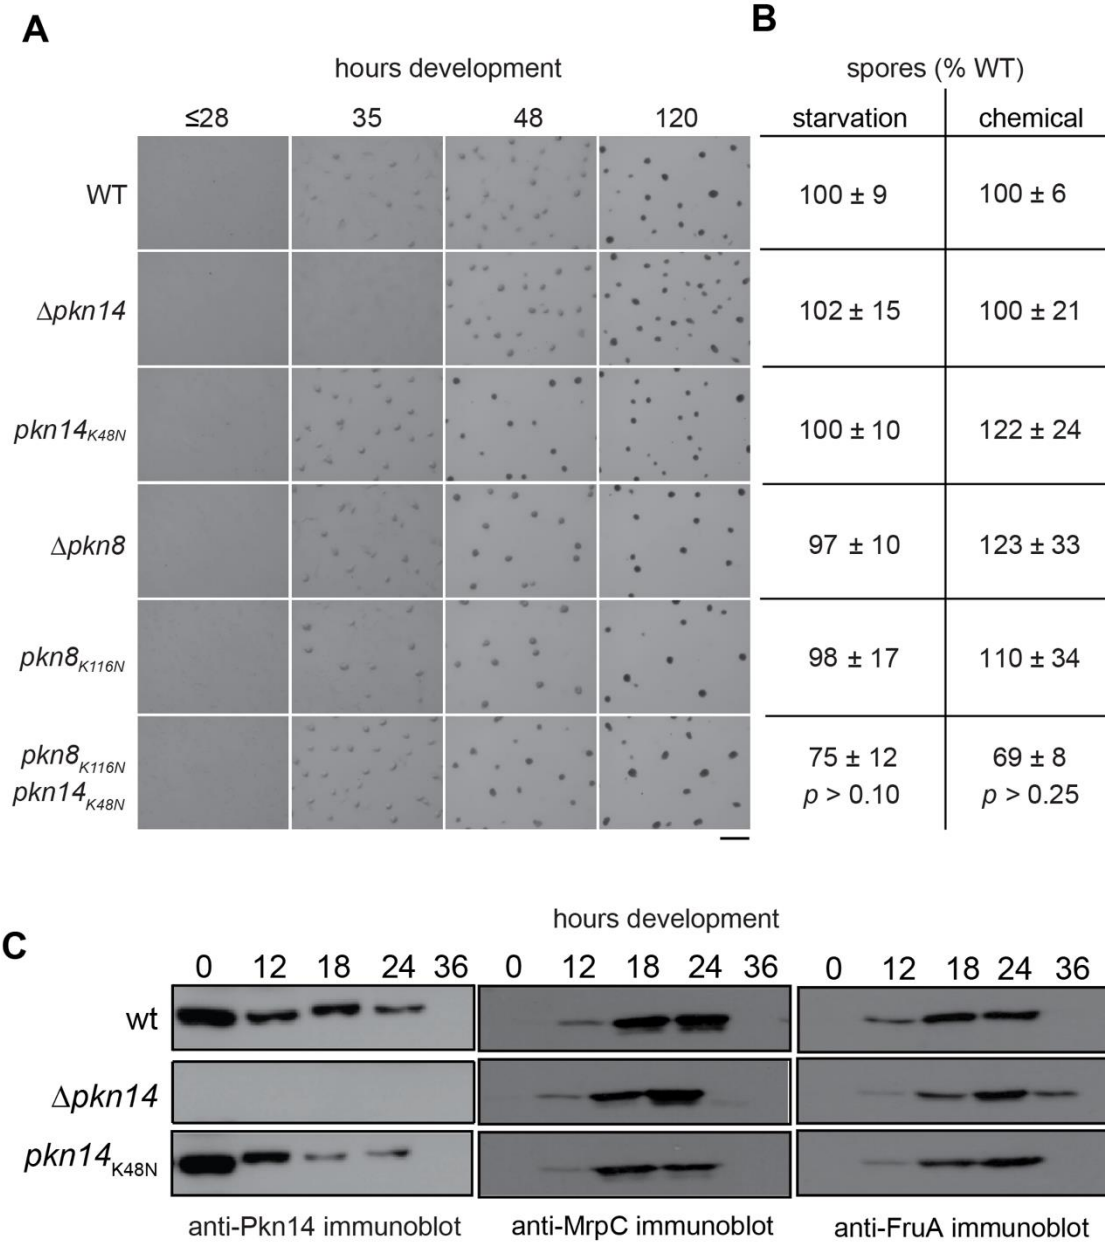

1306

1307 Figure 4. Pkn8/Pkn14 do not repress development in the *M. xanthus* DZ2 strain

1308 background. A. Developmental phenotypes of wild type DZ2,  $\Delta pkn14$  (PH1132),

1309  $pkn14_{K48N}$  (PH1133),  $\Delta pkn8$  (PH1347),  $pkn8_{K116N}$  (PH1548) and double point mutant

1310  $pkn14_{K48N} pkn8_{K116N}$  (PH1549) strains were induced to develop by submerged culture

1311 conditions and images were recorded at the indicated hours of development. Bar:

1312 0.5mm. B. Sporulation efficiencies from starvation-induced development (left) and



1313 chemical induced development (right). The number of heat and sonication resistant  
1314 spores harvested after 120 hrs development (left) or 24 hours of induction (right) and  
1315 reported as a percent of wildtype, respectively. Values are the average and associated  
1316 standard deviations from three independent biological replicates. *p*-value was  
1317 determined by chi-square analysis. C. Pkn14, MrpC, and FruA accumulation profiles in  
1318 wild type (DZ2),  $\Delta pkn14$  (PH1132), *pkn14*<sub>K48N</sub> (PH1133) or cells. 10  $\mu$ g lysates  
1319 generated from cells induced to develop under submerged culture for the indicated  
1320 hours post-starvation were subject to anti-Pkn14, -MrpC, or -FruA immunoblot, as  
1321 indicated.  
1322

1323

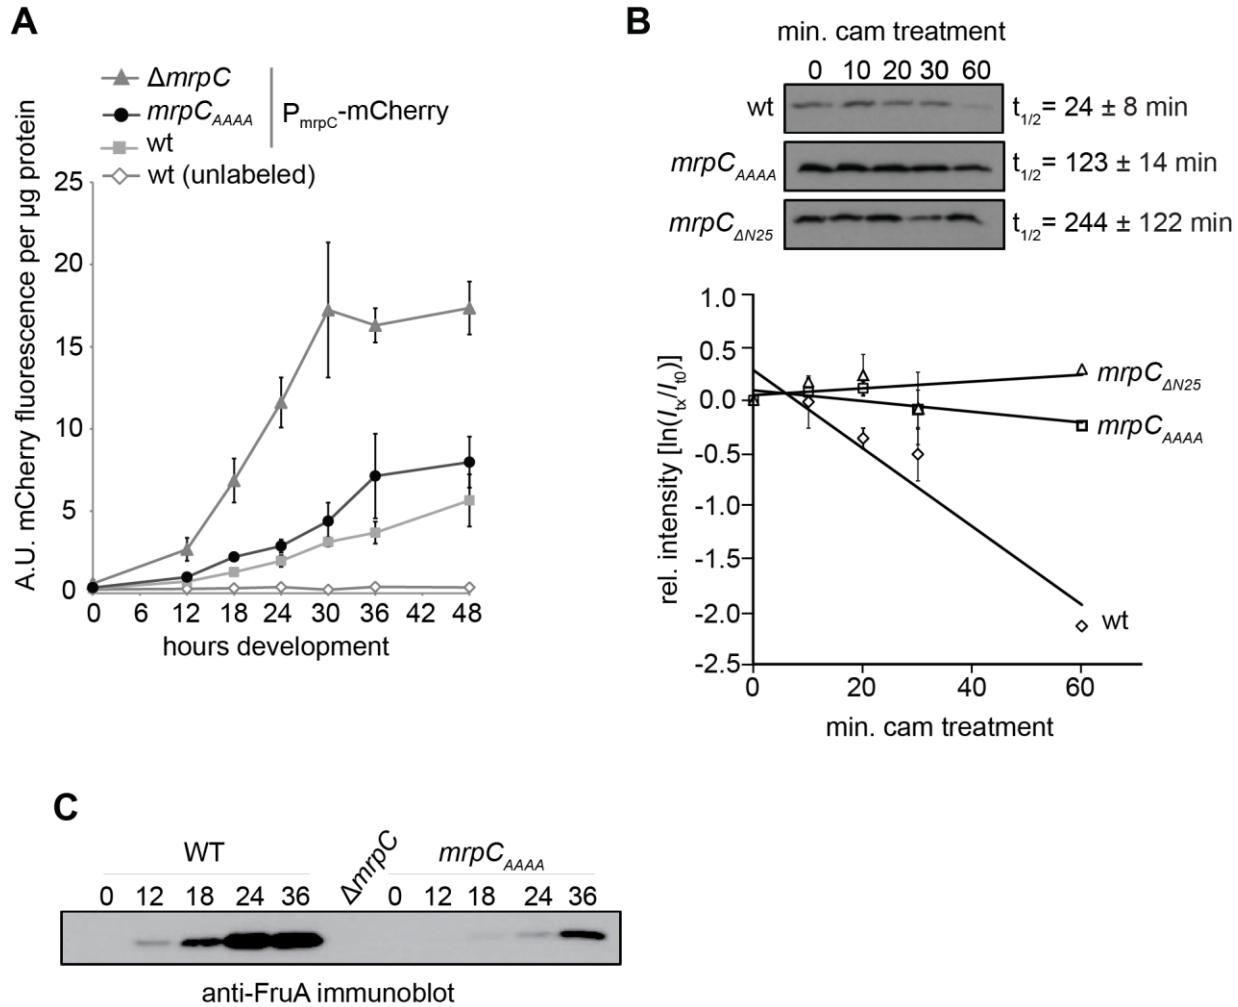

1324

1325 Figure 5. MrpC<sub>AAAA</sub> is perturbed in *mrpC* negative autoregulation, MrpC turnover, and

1326 FruA induction. A. Expression of a P<sub>mrpC</sub>-mCherry reporter in wild type (PH1100),

1327  $\Delta mrpC$  (PH1104), and  $mrpC_{AAAA}$  (PH1306) backgrounds. Cells were induced to

1328 develop under submerged culture conditions and harvested at the indicated times.

1329 mCherry fluorescence was recorded as arbitrary units (A. U.) and then normalized to

1330 total protein. Values are the average and associated standard deviations from three

1331 independent biological replicates. Wild type unlabeled (DZ2) cells lack the reporter. B.

1332 MrpC turnover assay. Wild type (wt; DZ2),  $mrpC_{AAAA}$  (PH1139), or  $mrpC_{\Delta N25}$  (PH1108)

1333 strains were induced to develop under submerged culture conditions for 9 hours and  
1334 treated with 34  $\mu\text{g ml}^{-1}$  chloramphenicol (cam) for the indicated times. Equal cell  
1335 amounts of each sample were subjected to anti-MrpC immunoblot (upper panels). MrpC  
1336 half-lives were calculated from two independent biological replicates where the MrpC  
1337 band intensity for each time point was normalized to the intensity at T=0 of the  
1338 respective strain and, and the natural log of the normalized intensities was plotted  
1339 versus min of chloramphenicol treatment (lower graph). The slope of the linear fit of the  
1340 data was used to calculate the MrpC half-life ( $t_{1/2}$ ) in each strain for each replicate, and  
1341 those values were averaged. Values plotted are the average and associated standard  
1342 deviation for each time point from the two replicates. C. Anti-FruA immunoblot analysis  
1343 of protein lysates harvested from  $\Delta mrpC$  *attB*: $P_{mrpC}$ -*mrpC*<sub>TTSS</sub> (WT: PH1118) or DZ2  
1344 *mrpC*<sub>AAAA</sub> (PH1139) strains developing under submerged culture conditions for the  
1345 indicated hours. The  $\Delta mrpC$  lysate (PH1025) was prepared from cells at 24 hours of  
1346 development.

1347

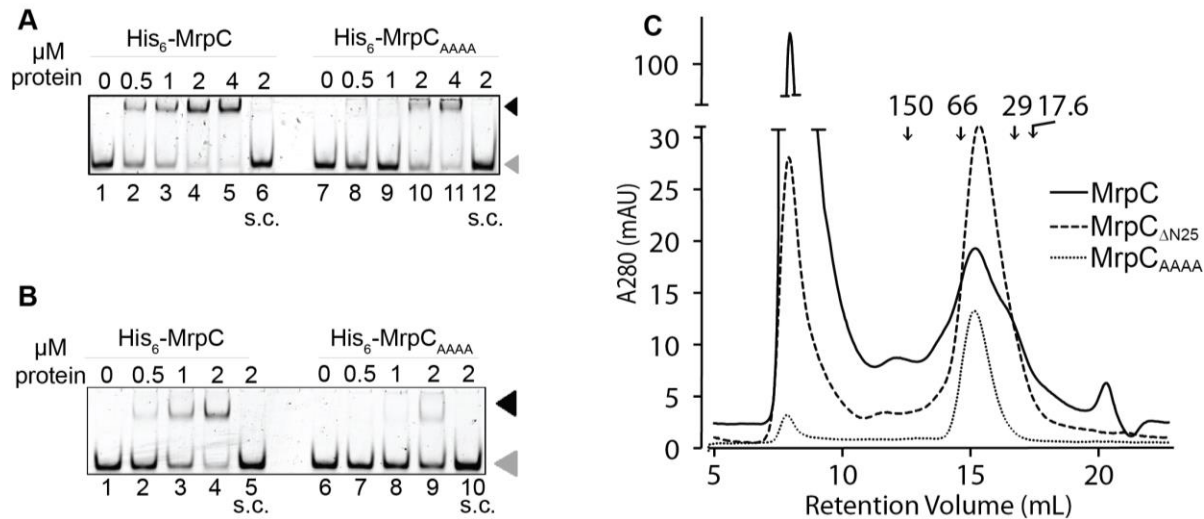

1348

1349 Figure 6. MrpC<sub>AAAA</sub> does not efficiently bind to *mrpC* or *fruA* promoter binding sites. A.

1350 Electrophoretic mobility shift assays (EMSAs) of His<sub>6</sub>-MrpC or His<sub>6</sub>-MrpC<sub>AAAA</sub> using

1351 *mrpC* promoter binding site 5. Increasing concentration (0-4 micromolar, as labeled) of

1352 His<sub>6</sub>-MrpC (lanes 1-6) or His<sub>6</sub>-MrpC<sub>AAAA</sub> (lanes 7-12) was incubated with 50 nM of

1353 fluorescently labeled probe. B. EMSA as in A. using *fruA1* promoter binding site.

1354 Increasing concentration (0-2 micromolar, as labeled) of His<sub>6</sub>-MrpC (lanes 1-5) or His<sub>6</sub>-

1355 MrpC<sub>AAAA</sub> (lanes 6-10) was incubated with 50 nM of fluorescently labeled probe. Lanes 6

1356 and 12 (A), or 5 and 10 (B) additionally contain 2.7 μM of the respective unlabeled

1357 probe (s.c., specific chase). Black arrowhead, protein + DNA complex; gray arrowhead,

1358 unbound DNA probe. C. MrpC<sub>AAAA</sub> and MrpC<sub>ΔN25</sub> retain dimerization capability in

1359 solution. Analytical size-exclusion chromatography on a Superdex™ 200 10/300 GL

1360 column using 4 nmol (8 μM x 500 μl) His<sub>6</sub>-MrpC (red), His<sub>6</sub>- MrpC<sub>ΔN25</sub> (blue) or His<sub>6</sub>-

1361 MrpC<sub>AAAA</sub> (black). Retention volumes of alcohol dehydrogenase (150 kDa), albumin (66

1362 kDa), carbonic anhydrase (29 kDa), and myoglobin (17.6 kDa) are depicted. Peak

1363 MrpC, MrpC<sub>ΔN25</sub>, or MrpC<sub>AAAA</sub> fractions corresponded to peaks at retention volumes of

1364 15.3, 15.5, and 15.2 mL, respectively, consistent with MrpC dimers (~50~60 kDa).
